1 **Multiple pathways of LRRK2-G2019S / Rab10 interaction in**  
2 **dopaminergic neurons**

3 Alison Fellgett <sup>1</sup>, C. Adam Middleton <sup>1</sup>, Jack Munns <sup>1</sup>, Chris Ugboode <sup>1</sup>, David  
4 Jaciuch <sup>1</sup>, Laurence Wilson <sup>2</sup>, Sangeeta Chawla <sup>1,3</sup> & Christopher J. H. Elliott <sup>1,3</sup>

5

6 1) Department of Biology, University of York, York, YO1 5DD, UK

7 2) Department of Physics, University of York, York, YO1 5DD, UK

8 3) York Biomedical Research Institute, Department of Biology, University of  
9 York, YO1 5DD, UK

10 Correspondence to CJHE – Department of Biology, University of York, York,  
11 YO1 5DD, UK. Email: [cje2@york.ac.uk](mailto:cje2@york.ac.uk), Tel: +44 1904 328654

12

13 Jack Munns' present address : MRC Laboratory of Molecular Biology, Francis  
14 Crick Avenue, Cambridge, CB2 0QH, UK

15 Keywords : *Drosophila*, dopamine, Leucine-rich-repeat-kinase2, bradykinesia,  
16 vision, circadian rhythms, sleep, courtship memory.

17

18 Acknowledgements. We are grateful for the gifts of flies from Kristin Scott,  
19 Wanli Smith, Cheng-Ting Chien, Julie Simpson, Serge Birman, and Stefan  
20 Heidmann. We also thank the York Biology Technology Facility, Bloomington  
21 Drosophila Supply Center and Flybase for their provision. Sean Sweeney,  
22 Chris MacDonald and Amy Cording kindly read a draft manuscript. We are  
23 particularly grateful to Parkinson's UK and to their volunteers for support (K-  
24 1704, G-1804).  
25

26 Abstract

27

28 **Background:** Inherited mutations in the LRRK2 protein are the most common  
29 known cause of Parkinson's, but the mechanisms by which increased kinase  
30 activity of mutant LRRK2 leads to pathological events remain to be  
31 determined. *In vitro* assays (heterologous cell culture, phospho-protein mass  
32 spectrometry) suggest that several Rab proteins might be directly  
33 phosphorylated by *LRRK2-G2019S*. Which Rabs interact with LRRK2 in  
34 dopaminergic neurons to facilitate normal and pathological physiological  
35 responses remains to be determined. An *in vivo* screen of Rab expression in  
36 dopaminergic neurons in young adult *Drosophila* demonstrated a strong  
37 genetic interaction between *LRRK2-G2019S* and Rab10. We now ask if Rab10  
38 is required for LRRK2-induced physiological responses in DA neurons.

39 **Methods:** *LRRK2-G2019S* was expressed in *Drosophila* dopaminergic neurons  
40 and the effects of Rab10 depletion on Proboscis Extension, vision, circadian  
41 activity pattern and courtship memory determined in aged flies.

42 **Results:** Rab10 loss-of-function rescued bradykinesia of the Proboscis  
43 Extension Response (PER) and visual defects of aged flies expressing LRRK2-  
44 G2019S in DA neurons. Rab10 knock-down however, did not rescue the  
45 marked sleep phenotype which results from dopaminergic expression of  
46 *LRRK2-G2019S*. Courtship memory is not affected by LRRK2 expression, but  
47 is markedly improved by Rab10 depletion. Anatomically, both LRRK2-  
48 G2019S and Rab10 are seen in the cytoplasm and at the synaptic endings of  
49 dopaminergic neurons.

50 **Conclusions:** We conclude that, in *Drosophila* dopaminergic neurons, Rab10  
51 is involved differentially in LRRK2-induced behavioral deficits. Therefore,  
52 variations in Rab expression may contribute to susceptibility of different  
53 dopaminergic nuclei to neurodegeneration seen in people with Parkinson's.

54





56 **Graphical Abstract**

57

58 Rab10 depletion ameliorates the proboscis extension bradykinesia and loss of

59 synaptic signalling in the retina induced by *LRRK2-G2019S* expression

60 (magenta arrows/orange crosses). Rab10 manipulation does not affect the

61 ‘sleep’ phenotype from *LRRK2-G2019S* (magenta arrow). Reduction of Rab10

62 facilitates conditioned courtship memory, but LRRK2 has no effect (yellow

63 arrow). All manipulations of Rab10 and *G2019S* in dopaminergic neurons,

64 shown in the outline of the brain (filled cells have high levels of Rab10). We

65 conclude that Rab10 and LRRK2 interact in some, but not all dopaminergic

66 neurons. This may underlie differences in the susceptibility of different

67 human striatal dopaminergic cells to Parkinson’s and explain why different

68 symptoms initiate particular ages.

69

70

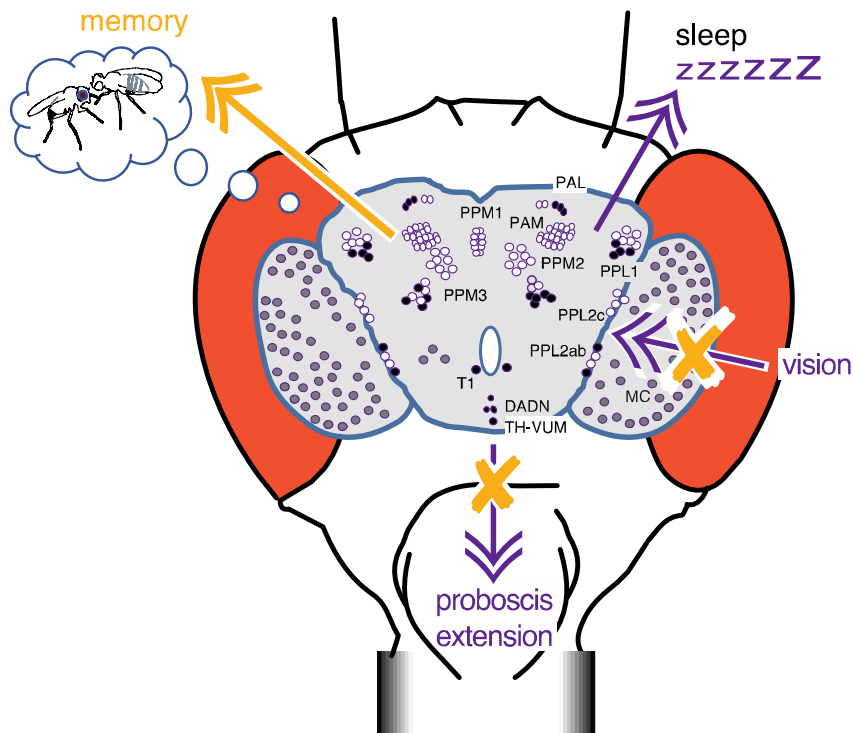

71

72

## 73 **Background**

74 Mutations in the *LRRK2* gene are the most frequent genetic cause of late onset  
75 Parkinson's. The *G2019S* mutation increases LRRK2 kinase activity [1],  
76 leading to a toxic cascade that kills dopaminergic neurons in the *substantia*  
77 *nigra*. This results in bradykinesia and sleep disturbances, while loss of  
78 dopaminergic amacrine cells in the retina contributes to visual deficits.  
79 However, the main steps between LRRK2 and these pathological outcomes  
80 remain to be determined. One of the first steps that has been suggested is that  
81 LRRK2-G2019S may phosphorylate a number of small GTPases [3,5,8,10,29,35  
82 & 43] [2]. Cell culture experiments have shown a particular effect on Rab10  
83 [2–7], (see [8] for review), while a visual screen of *Drosophila* synaptic  
84 processing indicated a particular synergy between Rab10 and G2019S [9]. As a  
85 molecular switch, phosphorylation of a Rab protein could result in changed  
86 effector binding with a series of downstream consequences. However, the  
87 level of Rab10 is quite disparate, even among different types of dopaminergic  
88 neurons [9,10] so that LRRK2 might not work in the same way in all  
89 dopaminergic neurons.

90 Since most genetic mouse models of Parkinson's have very weak phenotypes,  
91 with lack of neuropathology [11], we turned to the fly where manipulation of  
92 Parkinson's disease related genes leads to marked phenotypes: bradykinesia  
93 [12], loss of dopaminergic neurons [13], tremor [14], retinal degeneration [15]  
94 and sleep disorder [16] (see, for review [17]). As in mammals, fly  
95 dopaminergic neurons regulate movement, vision, sleep and memory.

96 To determine how important Rab10 is in the pathological cascade initiated by  
97 LRRK2 activity, we now test the knock-down/knock-out of Rab10 in  
98 dopaminergic neurons in the intact organism. We find the movement and  
99 visual deficits seen in flies expressing *LRRK2-G2019S* in dopaminergic  
100 neurons are rescued by the depletion of Rab10. However, the marked sleep  
101 phenotype caused by dopaminergic expression of LRRK2-G2019S is not  
102 affected by manipulation of Rab10. Conditioned courtship memory is not

103 affected by LRRK2, though dopaminergic Rab10 reduction markedly  
104 improves this. We therefore find a role for Rab10 downstream of activated  
105 LRRK2 in some, but not all, dopaminergic neurons in the activation of  
106 LRRK2-associated physiological deficits in *Drosophila*.

## 107 **Materials and Methods**

108 **Flies:** All flies tested were male *Drosophila melanogaster*, using *TH-GAL4* (kind  
109 gift of Serge Birman) to manipulate dopaminergic neurons or *nSyb-Gal4* (from  
110 Julie Simpson (corresponding Bloomington stock 51635) for pan-neuronal  
111 expression. *Gr5a-LexA* was used to express the LexOp-*ReachR*  
112 channelrhodopsin in the sugar sensitive neurons independently from the  
113 GAL4-UAS manipulations. Flies were raised and crossed using standard  
114 *Drosophila* protocols [9]. The full list of fly lines is in Table 1.

115 **Validation of Rab10 knock-down and phosphorylation by G2019S:** We used  
116 three strategies for Rab10 reduction. (i) We used a CRISPR/Cas9-generated  
117 *Rab10* null [18], in which Rab10 was severely reduced (both pan-Rab10 and  
118 phospho-Rab10 to less than 5% of wild-type, Fig. 1). This line was not used in  
119 the visual assay because the retinal RFP marker causes the eyes to fluoresce  
120 and this would distort the disco-chamber data. (ii) We used *Rab10<sup>RNAi</sup>*. This  
121 depleted phosphoRab10 (Fig. 1), but a small amount (~15%) of Rab10 was still  
122 present (Fig. 1). (iii) We used the deGradFP technique to knockout *YFP-Rab10*  
123 protein with the *vhhGFP* nanobody, to target *YFP-Rab10* to the proteasome.  
124 This was used in flies in which the wild-type Rab10 had been replaced by  
125 homologous recombination so that the *YFP-Rab10* was expressed at wild-type  
126 levels. This reduced the amount of phospho-Rab10 to ~50% of wild-type (Fig.  
127 1). In the *GFP-Rab10* background, expression of a RNAi against GFP depleted  
128 some phospho-Rab10, but not as much as the nanobody, so we did not use  
129 this further.

130 The ability of LRRK2-G2019S to phosphorylate Rab10 *in vivo* was confirmed  
131 (Fig. 1Aiv; Biv), by comparing *nSyb > LRRK2-G2019S* with the kinase-dead  
132 (KD) form (*LRRK2-G2019S-K1906M*). In the *nSyb > LRRK2-G2019S* flies, the

133 level of pRab10 was twice that of the controls, similar to the effect of pan-  
134 neuronal expression of *Rab10*.

135 **Western Blots:** The levels of Rab10 and LRRK2-G2019S were assayed by  
136 Western Blot using standard protocols [9,14]. For Rab10 the antibodies were:  
137  $\alpha$ -pan-Rab10 (Nanotools, clone 605B11),  $\alpha$ -phospho-Rab10 (Abcam, ab230261,  
138 1:1000), and for LRRK2 (Neuromab, clone N241A/34). We used  $\alpha$ -  
139 synaptotagmin 91 as a loading control [19]. Selectivity of Rab10 antibodies  
140 was confirmed by using a rat CNS extract [9]. For assay of *GFP-Rab10*, we  
141 used Guinea pig anti-GFP (Synaptic Systems, 1:1000) as described recently [9].  
142 Quantification of the blots was carried out in Fiji.

143 **Bradykinesia** was assessed using an optogenetic stimulus. Flies were fed  
144 retinal (1 mM) pipetted onto the surface of their food for 1 week in the dark at  
145 29 °C. They were restrained at 25 °C for 3 hours before the proboscis  
146 extension responses were observed with a Grasshopper 3 (Point Grey) camera  
147 mounted on a Zeiss Stemi microscope at 200 frames/second. A single flash  
148 was delivered from a ThorM470L3 LED, driven at 8 V for 7 ms. The stimulus  
149 was transcribed by *LexOp-ReachR* expressed in the Gr5a neurons. The area of  
150 the video occupied by the proboscis was automatically analysed by python  
151 code <https://github.com/biol75/PER>, and the Tukey - post-hoc test applied  
152 in R.

153 **Akinesia** was recorded from 1 week old flies, kept in the dark at 29 °C. Flies  
154 were restrained as described [14] and starved at 29 °C for 3 hours before being  
155 offered a droplet of 100 mM sucrose three times. Each response was scored  
156 Yes/No and the median response for each fly used. The  $\chi^2$ -post-hoc test  
157 (Fifer) was done in R (3.3.3).

158 **Visual assays:** On the day of emergence, flies were placed in the dark or in  
159 disco-chambers at 29 °C. 1 week old flies were prepared for SSVEP (Steady  
160 State Visual Evoked Potential) measurements as recently described [9].  
161 Stimuli were generated and responses recorded by an Arduino Due system  
162 with FFTs and contrast sensitivity computed in Matlab. Dunnett's post-hoc

163 test was applied in R. Full code at <https://github.com/wadelab/flyCode>.  
164 DPP (Deep-Pseudo-Pupil) images were captured with a Dino-Lite Camera  
165 and software, and images cropped, quantified and converted to grey scale in  
166 Fiji. Both images in Fig. 3Aii were combined in Fiji before the colour was  
167 removed and the contrast increased.

168 **Circadian rhythms and sleep** patterns were recorded as described recently  
169 [20] with a TriKinetics DAM system. Flies were placed in the monitor at 29 °C  
170 on the day of eclosion, and locomotor activity was recorded in 1 minute bins  
171 for 3 days under 12:12 h light/dark cycles followed by 7 to 10 days in constant  
172 darkness. Activity data was analysed using the ActogramJ plugin for ImageJ  
173 and sleep data using the ShinyR-DAM code [21] using the branch at  
174 [https://karolcichewicz.shinyapps.io/ShinyR-DAM\\_3\\_1\\_Beta/](https://karolcichewicz.shinyapps.io/ShinyR-DAM_3_1_Beta/).

175 **Conditioned courtship memory** was recorded using the well-developed  
176 conditioned courtship memory protocol for *Drosophila* [22,23]. One-week old  
177 males, (kept at 29 °C), were provided with a virgin female and the time spent  
178 in courting behaviours measured. Half of the males had recently (~ 30  
179 minutes before) spent an hour with a mated female; half were naïve. Males  
180 who fail to ‘remember’ their rejection will spend more time courting the  
181 virgin female than controls. The Courtship Index (CI) was calculated as the  
182 percentage of ten minutes that a male spent courting; and the memory index  
183 (MI) by dividing the CI of each test fly by the mean CI of the naïve/sham flies  
184 of the same genotype. A score of 0 indicates highest memory performance  
185 possible and a score of  $\geq 1$  indicates no memory. The distribution of MI was  
186 compared between genotypes using the Kolmogorov-Smirnov test. All naïve  
187 and trained groups contained 16-23 flies.

188 **Immunocytochemistry** was performed on 3-5 day old flies expressing *G2019S*  
189 as described recently [14], using the LRRK2 mouse antibody Neuromab (clone  
190 N241A/34). In some flies, mCD8-GFP was also expressed in the  
191 dopaminergic neurons. Each figure is representative of three preparations  
192 from at least two crosses.

193

## 194 **Results**

195 To investigate a role for Rab10 in dopaminergic neurons, downstream of  
196 activated LRRK2, we recombined the *Tyrosine-Hydroxylase* GAL4 with UAS-  
197 *G2019S* and designated these ‘PD-mimic’ flies as *THG2*. We compared these  
198 flies with controls in four types of behavioral/physiological phenotypes:  
199 bradykinesia in the proboscis extension response, neural signalling in the  
200 retina, sleep patterns and conditioned courtship memory. These four systems  
201 are controlled by different clusters of dopaminergic neurons.

### 202 *Rab10* reduction rescues *LRRK2-G2019S* bradykinesia

203 The major features of Parkinson’s are movement deficits (bradykinesia),  
204 slowing or loss of movement and tremor. We therefore begin our analysis  
205 with the movement of PD-mimic *THG2* flies. The Proboscis Extension  
206 Response (PER), a reaching movement used by Dipteran flies to obtain food,  
207 is particularly amenable to analysis [24] (Fig. 2Ai). When a fly walks across a  
208 surface and encounters a droplet of sugary solution, the sucrose-sensitive  
209 neurons on the legs are stimulated and this elicits a rapid extension of the  
210 proboscis. The PER is modulated by a single dopaminergic neuron, the  
211 Tyrosine Hydroxylase Ventral Unpaired Median (TH-VUM) neuron [25],  
212 which has a high level of Rab10 expression [9]. Expression of *G2019S* in this  
213 neuron results in movement deficits – akinesia (loss of the PER), slower  
214 response (bradykinesia) and tremor [14]. Further, the PER can be elicited  
215 using an optogenetic stimulus. In this paradigm, the sucrose-sensitive sensory  
216 neurons in the leg express a channelrhodopsin which is stimulated by a flash  
217 of light. Expression of a channelrhodopsin by the LexA/LexOp system in the  
218 sugar-sensitive ‘Gr5a’ neurons on the leg is independent of the expression of  
219 *LRRK2-G2019S* in the TH-VUM and other dopaminergic neurons by the  
220 GAL4-UAS system [26]. This precise control of the stimulus makes it possible  
221 to measure the time course of the reaching movement, and separates the

222 activation of the stimulus from manipulations using the GAL4 system in the  
223 dopaminergic neurons.

224 In our optogenetic setup, 60% of control flies respond to a single flash of light  
225 by smoothly extending their proboscis, whereas flies in which *Tyrosine-*  
226 *Hydroxylase* GAL4 was used to express *LRRK2-G2019S* (*THG2*) only respond  
227 30% of the time, i.e. *G2019S* induces akinesia (Fig. 2Aii). Those *THG2* flies that  
228 do respond, take ~100 ms longer to achieve maximum extension, showing  
229 bradykinesia (Fig. 2Aiii, iv). Knock-down of Rab10 using *Rab10<sup>RNAi</sup>* co-  
230 expressed with *LRRK2-G2019S* in the dopaminergic neurons, fully reverts  
231 both akinesia and the bradykinesia (Fig. 2Aii-iv).

232 We next tested if Rab10 knock-down would also rescue the deficits induced  
233 by *G2019S* in response to the natural stimulus, a sugar solution. Just over two-  
234 thirds of control flies respond to sucrose (70%, Fig. 2Bi, green bars), whereas  
235 less than half of *THG2* flies respond to sucrose (46 %, Fig. 2Bi, magenta). This  
236 deficit is fully rescued when *Rab10<sup>RNAi</sup>* is co-expressed with *THG2* (*THG2* >  
237 *Rab10<sup>RNAi</sup>* Fig. 2Bi, yellow). Dopaminergic expression of *Rab10<sup>RNAi</sup>* alone has  
238 no effect on the proportion of flies that respond to the sucrose solution (*TH* >  
239 *Rab10<sup>RNAi</sup>*, Fig. 2Bi, green).

240 As RNAi may have off-target effects, we supplemented this with a nanobody-  
241 mediated-protein knockdown technique, deGradFP [27,28]. In this, we  
242 deployed flies in which the wild-type *Rab10* gene had been replaced by *YFP-*  
243 *Rab10* by homologous recombination. Then we expressed an anti-GFP  
244 nanobody (*vhhGFP*) to deplete YFP-Rab10 protein in just the dopaminergic  
245 neurons using *TH-GAL4*. In this experiment, *YFP-Rab10* flies with both  
246 *G2019S* and *vhhGFP* expression (Fig. 2Bii, yellow bar) responded identically to  
247 wild-types, or *YFP-Rab10* controls in which dopaminergic neurons expressed  
248 just *vhhGFP* (Fig. 2Bii, *YFP-Rab10; TH* > *vhhGFP* green bar). This indicates a  
249 full rescue of the *THG2* induced akinesia. We confirmed that expressing  
250 *G2019S* and *vhhGFP* in flies with wild-type *Rab10* still resulted in akinesia  
251 (Fig. 2Bii, magenta bar).



252 While the *Rab10* knockout is lethal in mammals [29], the fly *Rab10* null  
253 (*Rab10<sup>-</sup>*) is viable [18]. We therefore tested if a global removal of Rab10 would  
254 also ameliorate the akinesia deficit in the *THG2* flies. In the *Rab10<sup>-</sup>*  
255 background, the *THG2* Proboscis Extension Response is fully rescued (Fig.  
256 2Biii, orange), to the same level as wild-type controls (Fig. 2Bi, green). In  
257 control experiments, the proportion of *Rab10<sup>-</sup>* flies that responded to sucrose  
258 was identical to wild-types; this was true for the homozygote stock and for an  
259 outcross to *TH* in males (*Rab10* is on the X-chromosome)(Fig. 2Biii, pale  
260 green).

261 Rab10 is known to be phosphorylated by LRRK2 *in vitro* [2] and in the fly, *in*  
262 *vivo* (Fig. 1). Phosphorylation is likely to be part of the activation mechanisms  
263 of Rab10. If increasing phosphorylation of Rab10 is a key event in *LRRK2-*  
264 *G2019S* driven dysfunction in dopaminergic neurons, we would expect  
265 dopaminergic expression of *Rab10* to phenocopy that of *G2019S*. We found  
266 that 55% of such *TH > Rab10* flies responded to sucrose, in an almost identical  
267 manner to the *THG2* flies (Fig. 2Biv) with pronounced akinesia. No further  
268 increase in akinesia is seen when both *G2019S* and *Rab10* are expressed at the  
269 same time.

270 To confirm that akinesia was solely dependent on dopaminergic Rab10, we  
271 took the *Rab10* null, and crossed it with flies expressing Rab10 in just the  
272 dopaminergic neurons. Such *Rab10<sup>-</sup>; TH > Rab10* flies have akinesia when  
273 compared with the *Rab10<sup>-</sup>* flies (Fig. 2Biii). Similarly, the *Rab10<sup>-</sup>; THG2 >*  
274 *Rab10* show less response than *THG2 > Rab10* flies.

275 Thus, the *G2019S*-induced movement deficits in the PER are rescued by  
276 depleting Rab10 in the dopamine neurons either at the mRNA level using  
277 RNAi, or at the protein level using a nanobody, or with the global null.  
278 Increasing Rab10 in the dopaminergic neurons induces akinesia similar to the  
279 expression of *LRRK2-G2019S*.

280 *Dopaminergic reduction in Rab10 rescues G2019S-induced visual deficits*



281 People with Parkinson's also show visual deficits including loss of  
282 dopaminergic neurons from the retina [30,31]. Aged *THG2* flies also show  
283 strong retinal degeneration with vacuoles throughout the optic lobe [15]. To  
284 demonstrate retinal degeneration, we deployed the 'Deep-Pseudo-Pupil'  
285 (DPP) assay [32]. When wild-type flies are illuminated from below, they  
286 show a DPP, with about 6-8 glowing ommatidia. In this, the normal retinal  
287 structure focuses light from directly below towards the observer through the  
288 center of the ommatidium, whereas light which is off-center is blocked by the  
289 pigment granules at the edge of the ommatidium (Fig. 3Ai). We tested several  
290 types of genetic background for the *THG2* 'PD—mimic' flies used in  
291 movement assays and found that the contrast between DPP and the red eye  
292 pigment was best when the *THG2* was in the deGradFP background.  
293 Although the DPP was clear in these young flies, in flies aged for 14 days, the  
294 DPP is distorted in these *THG2;vhhGFP* flies (Fig. 3A ii-iv). The outline of the  
295 DPP is irregular, rather than a neat ellipse, and the number and dispersion of  
296 the glowing ommatidia was increased. However, when dopaminergic *Rab10*  
297 is depleted in the *THG2* deGradFP fly, the DPP is much less disrupted (*YFP-*  
298 *Rab10; THG2 > vhhGFP* Fig. 3A ii-iv). There are fewer light-transmitting  
299 ommatidia and they are all adjacent. Thus, dopaminergic *Rab10* reduction is  
300 sufficient to rescue the *G2019S*-induced neurodegeneration. We conclude that  
301 expression of *G2019S* leads to degeneration of the retina, including a  
302 lysosomal deficit in the pigment granules.

303 In People with Parkinson's, the retinal degeneration of dopaminergic  
304 amacrine cells is accompanied by changes in contrast detection e.g. [33]. We  
305 therefore tested if the anatomical degeneration of the fly eye is linked to a loss  
306 of visual physiological contrast sensitivity. To do this, we used the SSVEP  
307 (Steady State Visual Evoked Potential) method which is automated to  
308 distinguish the photoreceptor contrast sensitivity from the synaptic response  
309 of the second order lamina neurons. At 7 days, all dark-reared control and  
310 *THG2* flies show a strong SSVEP photoreceptor signal, indicating that the eyes  
311 are functioning normally. There is no effect of the manipulation of *Rab10* (Fig.

312 3B, solid bars). On the other hand, when exposed to a mild visual stress to  
313 accelerate neurodegeneration (by being kept in the disco chamber for 1 week  
314 [15]), the *THG2* flies lose almost all their visual response – it is reduced to  
315 18 % of the wild-type dark level (Fig. 2Bii,iii, hatched magenta bars; controls  
316 in green), indicating loss of photoreceptor function. As with the anatomical  
317 measure, the contrast sensitivity of the eye was rescued using the deGradFP  
318 manipulation (*YFP-Rab10; THG2 > vhhGFP*, Fig. 2Bi, yellow bar). With co-  
319 expression of *Rab10<sup>RNAi</sup>*, this *THG2* deficit is also fully rescued (Fig. 3Dii,  
320 yellow bar).

321 Thus, both electrophysiological response and structural observation of the  
322 DPP indicate that *Rab10* knock-down rescues the effect of dopaminergic  
323 *LRRK2-G2019S*.

#### 324 *LRRK2-induced daily activity deficits are not affected by Rab10*

325 A third behavior modulated by dopaminergic neurons is the daily sleep-wake  
326 rhythm, both in human [34] and fly [35] (see [36] for review). The  
327 dopaminergic neurons in the fly mushroom bodies are key players in the  
328 daily activity rhythm. Locomotor activity during light/dark cycles provides a  
329 measure of circadian rhythm and sleep-wake behavior (Fig. 4A). Periods of  
330 inactivity longer than 5 minutes defined as ‘sleep’ (see [37]). In 12h:12h light  
331 on:off cycles, all flies tested show a daily sleep-wake rhythm, sleeping more in  
332 the light than in the dark, with *THG2* flies sleeping ~15% more than the  
333 controls during the ‘day’ (Fig. 4B). At the light/dark transition, all flies have  
334 high, persistent activity, and little sleep. *THG2* flies continue their activity  
335 during the dark, spending less than 50% of the time ‘asleep’ in the dark that  
336 control flies managed (*TH/+*, Fig. 4B). Neither reduction nor increased  
337 expression of *Rab10* in dopaminergic neurons affected the sleep/wake cycle  
338 of either the control or *LRRK2-G2019S* flies. Following light-dark entrainment  
339 (LD), in the dark (DD), the fly locomotor activity pattern persists with a ~24  
340 hour cycle providing a measure of intrinsic circadian rhythms. The period of  
341 the circadian rhythm was not affected by *LRRK2-G2019S* or *Rab10*

342 manipulation, though a small reduction was seen when both transgenes were  
343 expressed (Fig. 4A). This is not unexpected as the circadian period is not  
344 affected by dopamine manipulations [38].

345 Thus, the normal sleep-wake cycle is disrupted by dopaminergic *LRRK2-*  
346 *G2019S*, but not by *Rab10* manipulation, even though Rab10 in the context of  
347 LRRK2-G2019S is seen to regulate the Proboscis Extension Response and  
348 retina.

#### 349 *Improved Memory-due to Rab10 depletion are insensitive to LRRK2-G2019S*

350 Dopaminergic circuits also affect memory in both human [39] and fly [40,41].  
351 We deployed the conditioned courtship short-term memory protocol, which  
352 is dependent on the well-known dopaminergic MB neurons [42] to assess the  
353 effects of Rab10 and *G2019S*. In this assay, males are allowed to court mated  
354 females, which reject their advances. When presented with more receptive  
355 virgin females, they tend to court less as they ‘remember’ their rejection. We  
356 found that dopaminergic knock-down of Rab10 substantially reduced the  
357 memory index, with over half of the *TH > Rab10<sup>RNAi</sup>* flies having a memory  
358 index less than 0.05, i.e. they have excellent memory. In contrast, only 10% of  
359 control flies had a memory index less than 0.05 (Fig. 5A). When *G2019S* was  
360 expressed, no change in the distributions was seen, and Rab10 depletion still  
361 improved memory (Fig. 5B).

362 We conclude that, in the conditioned courtship assay, Rab10 is present and  
363 has a key role in the dopaminergic neurons, but that the behavior is not  
364 affected by dopaminergic expression of *G2019S*.

#### 365 *Cytoplasmic Location of G2019S and Rab10*

366 In *THG2* flies, ectopically expressed LRRK2-G2019S protein is detected in  
367 dopaminergic neurons more strongly in the cytoplasm than the nucleus (Fig.  
368 6A). The highest expression intensity is seen in the cytoplasm surrounding the  
369 nucleus and is quite uneven, with small holes, possibly representing the  
370 absence of the LRRK2 protein from lysosomes or mitochondria. Additionally,

371 there is very weak staining along the axons and of the synaptic endings,  
372 including the mushroom bodies and fan-shaped body (Fig. 6C). A similar  
373 pattern of staining is seen with dopaminergic expression of *hLRRK2-wild-type*  
374 (data not shown). Rab 10 expression (*TH > Rab10-YFP* flies, Fig. 6B) shows a  
375 staining in the cytoplasm, with the strongest fluorescence at the synaptic  
376 terminals, noticeably in the neuropil of the mushroom bodies and fan-shaped  
377 body.

## 378 Discussion

379 Having previously demonstrated a strong genetic interaction, *in vivo*, between  
380 LRRK2 and Rab10 [9], we sought to determine whether manipulation of  
381 Rab10 affected the physiological deficits associated with flies expressing  
382 LRRK2 G2019S. We have identified a requirement for Rab10 in mediating the  
383 movement and visual deficits induced by dopaminergic expression of *LRRK2-*  
384 *G2019S*. In contrast, in two other dopaminergic physiological systems, there  
385 was no interaction: in one (the circadian sleep/wake cycle) *LRRK2-G2019S*  
386 has a marked phenotype independent of Rab10; in the other (conditioned  
387 courtship memory) Rab10 has a distinct role, but there is no *LRRK2-G2019S*  
388 phenotype. As such, we have begun to identify the individual dopaminergic  
389 circuits in the fly that are most sensitive to LRRK2-Rab10 interplay.

### 390 *Rab10 knock-down rescues movement and visual deficits from dopaminergic LRRK2-* 391 *G2019S expression*

392 Movement and visual deficits induced by LRRK2-G2019S expression have  
393 been linked to low dopamine release in the TH-VUM and some PPL/MC  
394 neurons that control the PER and vision respectively [14,15]. We focus here on  
395 how the LRRK2-Rab10 interaction might lead to a potential loss of dopamine  
396 release. First, *Rab10* is strongly expressed in these neurons [9] and so could  
397 play a role in controlling dopamine traffic or exocytosis. *LRRK2-G2019S*  
398 expression in the fly CNS increases the phosphorylation of Rab10  
399 approximately two-fold. Knock-down by *Rab10<sup>RNAi</sup>* reduces the level of  
400 pRab10 below the level at which it is detected, though some Rab10 is still

401 present. Additionally, protein knock-down using deGradFP lowers pRab10  
402 and rescues the proboscis extension/visual deficits, though the reduction in  
403 Rab10 reported by Western Blot was not so strong as with *Rab10<sup>RNAi</sup>*. Thus,  
404 the amelioration, *in vivo* of *G2019S*-induced movement and visual deficits by  
405 *Rab10<sup>RNAi</sup>* is in accord with data from cell culture that Rab10 is a key target of  
406 LRRK2 [2–7]. Our data additionally shows, at least for a subset of *Drosophila*  
407 dopaminergic neurons, Rab10 is likely the relevant physiological substrate for  
408 LRRK2-*G2019S*.

409 This genetic interaction between Rab10 and LRRK2-*G2019S* does not imply  
410 that the physical interaction is direct, though the anatomical evidence shows  
411 that both proteins spread along the axons to the synaptic endings and are  
412 likely in proximity. Rab proteins often work in functionally linked chains e.g.  
413 [43,44]. Our data does not exclude that the *LRRK2-G2019S* deficits also  
414 involve other Rabs.

415 The cellular consequences of phosphorylation of Rab10 are not yet fully clear,  
416 but it has been suggested that this may switch the effectors to which Rab10  
417 binds [8,44,45]. In dividing cells in culture phosphorylation of Rab10 by  
418 LRRK2 reduces ciliogenesis [46,47]. However, the relevance of this to the  
419 terminally differentiated adult *Drosophila* CNS neurons is not clear. Both  
420 LRRK2 and Rab10 have been linked to mitochondrial damage resolution,  
421 through the Rab10 effector OPTN (optineurin) [48] though *Drosophila* do not  
422 have an evident OPTN homolog (this function could be fulfilled by an as yet  
423 unidentified protein). Another role for LRRK2 – control of vesicle transport at  
424 the TGN – has support from HEK cells [49] and fly neurons. In the fly retina,  
425 a Rab10 interaction has been reported occurring at the TGN with its GEF Crag  
426 and effector Ehbp1 [50], affecting vesicle budding. Interestingly, the fly  
427 ortholog of LRRK2, which is dLRRK, is linked to the golgin protein, Lava  
428 lamp, at Golgi outposts in neurites [51]. An effect on vesicle transport at the  
429 TGN, along with consequent endosomal disruption [43,52–54] may provide  
430 an explanation for a lack of dopamine release.

431 *Sleep/wake cycles and conditioned courtship memory do not depend on an interaction*  
432 *between Rab10 and LRRK2-G2019S*

433 In stark contrast, in the same animals, dysfunction in other dopamine-  
434 mediated behaviours does not require Rab10. *Rab10<sup>RNAi</sup>* did not ameliorate the  
435 change in daily sleep defect induced by LRRK2-G2019S, and overexpression  
436 of Rab10 did not phenocopy G2019S- induced sleep defects. While *Rab10<sup>RNAi</sup>*  
437 expression affected the conditioned courtship memory, indicating the  
438 presence of Rab10 and its importance in these dopaminergic neurons, *LRRK2-*  
439 *G2019S* had no phenotype. Thus, Rab10 seems to be present, but not affected  
440 by *LRRK2-G2019S*.

441 Dopaminergic neurons display varied levels of Rab10 even within a  
442 particular cluster [9]. Consequently, it is possible that the Rab10 GEFs, GAPs  
443 and effectors may also differ between the subsets of the dopaminergic  
444 neurons in the PAM, PPL1 and PPM3 neurons, the clusters that regulate the  
445 sleep-wake cycle [35,55,56]. The pattern of gene expression in the three types  
446 of PAM neurons is complex [10]. The GEF *Crag* was expressed in only one  
447 type; the GAPs *Evi5* and *plx* in different types, while the effector pattern is  
448 more complex: *Ehbp1* and *Rilpl (CG11448)* in all three PAM-types but another  
449 effector (*Mical*) is present in none. This suggests that Rab10 function may be  
450 regulated differentially in different dopaminergic neuronal clusters. Further,  
451 *dLRRK* is expressed in the dopaminergic neurons in to optic lobe, but not in  
452 the PAM neurons [10]. The variation in gene expression may explain why  
453 some labs have identified other potential LRRK2 interactors – for example  
454 EndophilinA, in *Drosophila* larval glutamatergic neuromuscular synapses  
455 [57].

456 **Conclusion:** Our key finding is that that LRRK2-G2019S may signal by  
457 several pathways, even within the dopaminergic neuron population. We  
458 conclude that an uneven distribution of Rabs, their effectors and binding  
459 partners may contribute to the differences in the rate of dopaminergic neuron

460 degeneration in the human striatum. Multiple LRRK2 pathways may also  
461 explain why the range of Parkinson's symptoms initiate at different ages.

462

463

464

465

## 466 Table of Abbreviations

| Abbreviation | Full text                                                                   |
|--------------|-----------------------------------------------------------------------------|
| CI           | Courtship Index                                                             |
| DAM          | Drosophila activity monitor                                                 |
| dLRRK        | The Drosophila homolog of LRRK2                                             |
| DPP          | Deep-Pseudo-Pupil                                                           |
| FFT          | Fast-Fourier Transform                                                      |
| Gal4/UAS     | A binary system for targeted gene expression in the fly                     |
| GAP          | GTPase-activating protein                                                   |
| GEF          | Guanine nucleotide exchange factor                                          |
| LED          | Light-Emitting Diode                                                        |
| LexA/LexOp   | A second, independent binary system for targeted gene expression in the fly |
| LRRK2        | Leucine-rich-repeat kinase2                                                 |
| MC           | dopaminergic neurons in the optic lobe (also known as Mi15 neurons)         |
| MI           | Memory index                                                                |
| nSyb         | neuronal Synaptobrevin                                                      |
| OPTN         | optineurin                                                                  |
| PAM          | A cluster of dopaminergic neurons in the fly brain                          |
| PER          | Proboscis Extension Response                                                |
| PPL          | A second cluster of dopaminergic neurons in the fly brain                   |
| PPM          | Another cluster of dopaminergic neurons in the fly brain                    |
| SSVEP        | Steady State Visual Evoked Potential                                        |
| TGN          | Trans-Golgi Network                                                         |
| TH           | Tyrosine-Hydroxylase                                                        |
| TH-VUM       | Tyrosine Hydroxylase Ventral Unpaired Median neuron                         |
| <i>THG2</i>  | Flies with TH Gal4 recombined with UAS-LRRK2-G2019S (PD-mimic)              |
| YFP          | Yellow Fluorescent Protein                                                  |



467

468 **Declarations**

469 Ethics approval and consent to participate. All experiments are with

470 *Drosophila melanogaster* and do not require consent.

471 Consent for publication. All authors read and approved the final manuscript.

472 Availability of data and material. Full statistical and genetic data is available

473 in the Supplementary Tables, and the raw data is available on request

474 Competing interests. None declared

475 Funding: Parkinson's UK, (K-1704, G-1804).

476 Authors' contributions AF, CAM, JM, CU, DJ performed experiments, SC and

477 LW developed apparatus/methods, SC and CJHE analysed data, CJHE

478 drafted the manuscript, which was edited by SC, JM, DJ and CJHE.

479

480

481 REFERENCES

482

- 483 1. Greggio E, Cookson MR. Leucine-Rich Repeat Kinase 2 Mutations and  
484 Parkinson's Disease: Three Questions. *ASN Neuro*. 2009;1:AN20090007.
- 485 2. Steger M, Diez F, Dhekne HS, Lis P, Nirujogi RS, Karayel O, et al.  
486 Systematic proteomic analysis of LRRK2-mediated Rab GTPase  
487 phosphorylation establishes a connection to ciliogenesis. *Elife*. 2017;6:e31012.
- 488 3. Fan Y, Howden AJM, Sarhan AR, Lis P, Ito G, Martinez TN, et al.  
489 Interrogating Parkinson's disease LRRK2 kinase pathway activity by  
490 assessing Rab10 phosphorylation in human neutrophils. *Biochem J*.  
491 2018;475:23–44.
- 492 4. Jeong GR, Jang E-H, Bae JR, Jun S, Kang HC, Park C-H, et al. Dysregulated  
493 phosphorylation of Rab GTPases by LRRK2 induces neurodegeneration. *Mol*  
494 *Neurodegener*. 2018;13:8.
- 495 5. Thirstrup K, Dächsel JC, Oppermann FS, Williamson DS, Smith GP, Fog K,  
496 et al. Selective LRRK2 kinase inhibition reduces phosphorylation of  
497 endogenous Rab10 and Rab12 in human peripheral mononuclear blood cells.  
498 *Sci Rep*. 2017;7:10300.
- 499 6. Liu Z, Bryant N, Kumaran R, Beilina A, Abeliovich A, Cookson MR, et al.  
500 LRRK2 phosphorylates membrane-bound Rabs and is activated by GTP-  
501 bound Rab7L1 to promote recruitment to the trans-Golgi network. *Hum Mol*  
502 *Genet*. 2018;27:385–95.
- 503 7. Kelly K, Wang S, Boddu R, Liu Z, Moukha-Chafiq O, Augelli-Szafran C, et  
504 al. The G2019S mutation in LRRK2 imparts resiliency to kinase inhibition. *Exp*  
505 *Neurol*. 2018;309:1–13.
- 506 8. Alessi DR, Sammler E. LRRK2 kinase in Parkinson's disease. *Science (80- )*.  
507 2018;360:36–7.
- 508 9. Petridi S, Middleton CA, Ugbo C, Fellgett A, Covill L, Elliott CJH. In

- 509 Vivo Visual Screen for Dopaminergic Rab ↔ LRRK2-G2019S Interactions in  
510 *Drosophila* Discriminates Rab10 from Rab3. *G3 (Bethesda)*. 2020;10:1903–14.
- 511 10. Davis FP, Nern A, Picard S, Reiser MB, Rubin GM, Eddy SR, et al. A  
512 genetic, genomic, and computational resource for exploring neural circuit  
513 function. *Elife*. 2020;9:1–40.
- 514 11. Daniel G, Moore DJ. Modeling LRRK2 pathobiology in Parkinson’s  
515 disease: From yeast to rodents. *Curr Top Behav Neurosci*. 2014;22:331–68.
- 516 12. Feany MB, Bender WW. A *Drosophila* model of Parkinson’s disease.  
517 *Nature*. 2000;404:394–8.
- 518 13. Liu Z, Wang X, Yu Y, Li X, Wang T, Jiang H, et al. A *Drosophila* model for  
519 LRRK2-linked parkinsonism. *Proc Natl Acad Sci U S A*. 2008;105:2693–8.
- 520 14. Cording AC, Shiaelis N, Petridi S, Middleton CA, Wilson LG, Elliott CJH.  
521 Targeted kinase inhibition relieves slowness and tremor in a *Drosophila*  
522 model of LRRK2 Parkinson’s. *npj Park Dis*. 2017;3:34.
- 523 15. Hindle SJ, Afsari F, Stark M, Middleton CA, Evans GJO, Sweeney ST, et al.  
524 Dopaminergic expression of the Parkinsonian gene LRRK2-G2019S leads to  
525 non-autonomous visual neurodegeneration, accelerated by increased neural  
526 demands for energy. *Hum Mol Genet*. 2013;22:2129–40.
- 527 16. Julienne H, Buhl E, Leslie DS, Hodge JLL. *Drosophila* PINK1 and parkin  
528 loss-of-function mutants display a range of non-motor Parkinson’s disease  
529 phenotypes. *Neurobiol Dis*. 2017;104:15–23.
- 530 17. Hewitt VL, Whitworth AJ. Mechanisms of Parkinson’s Disease. *Curr Top*  
531 *Dev Biol*. 2017. p. 173–200.
- 532 18. Kohrs FE, Daumann I, Pavlović B, Jin EJ, Lin S-C, Port F, et al. Systematic  
533 functional analysis of Rab GTPases reveals limits of neuronal robustness in  
534 *Drosophila*. *bioRxiv*. 2020;2020.02.21.959452.
- 535 19. West RJH, Lu Y, Marie B, Gao F-B, Sweeney ST. Mutations in Rab8  
536 Identify A POSH/TAK1 Signal Regulating Synaptic Growth in *Drosophila*. *J*

- 537 cell biol. 2015;in press.
- 538 20. Nippe OM, Wade AR, Elliott CJH, Chawla S. Circadian Rhythms in Visual  
539 Responsiveness in the Behaviorally Arrhythmic *Drosophila* Clock Mutant *Clk*  
540 *Jrk*. *J Biol Rhythms*. 2017;32:583–92.
- 541 21. Cichewicz K, Hirsh J. ShinyR-DAM: a program analyzing *Drosophila*  
542 activity, sleep and circadian rhythms. *Commun Biol*. 2018;1:25.
- 543 22. Griffith LC, Ejima A. Courtship learning in *Drosophila melanogaster*:  
544 Diverse plasticity of a reproductive behavior. *Learn Mem*. 2009;16:743–50.
- 545 23. Koemans TS, Oppitz C, Donders RAT, van Bokhoven H, Schenck A,  
546 Keleman K, et al. *Drosophila* Courtship Conditioning As a Measure of  
547 Learning and Memory. *J Vis Exp*. 2017;e55808.
- 548 24. Dethier VG. The hungry fly: A physiological study of the behavior  
549 associated with feeding. 1976.
- 550 25. Marella S, Mann K, Scott K. Dopaminergic modulation of sucrose  
551 acceptance behavior in *Drosophila*. *Neuron*. 2012;73:941–50.
- 552 26. Zhou Y, Cao LH, Sui XW, Guo XQ, Luo DG. Mechanosensory circuits  
553 coordinate two opposing motor actions in *Drosophila* feeding. *Sci Adv*.  
554 2019;5:1–14.
- 555 27. Urban E, Nagarkar-Jaiswal S, Lehner CF, Heidmann SK. The Cohesin  
556 Subunit Rad21 Is Required for Synaptonemal Complex Maintenance, but Not  
557 Sister Chromatid Cohesion, during *Drosophila* Female Meiosis. Hawley RS,  
558 editor. *PLoS Genet*. 2014;10:e1004540.
- 559 28. Caussin E, Kanca O, Affolter M. Fluorescent fusion protein knockout  
560 mediated by anti-GFP nanobody. *Nat Struct Mol Biol*. 2012;19:117–21.
- 561 29. Lv P, Sheng Y, Zhao Z, Zhao W, Gu L, Xu T, et al. Targeted disruption of  
562 *Rab10* causes early embryonic lethality. *Protein Cell*. 2015;6:463–7.
- 563 30. Harnois C, Di Paolo T. Decreased dopamine in the retinas of patients with  
564 Parkinson's disease. *Invest ophthalmol vis sci*. 1990;31:2473.

- 565 31. Ortuño-Lizarán I, Sánchez-Sáez X, Lax P, Serrano GE, Beach TG, Adler CH,  
566 et al. Dopaminergic retinal cell loss and visual dysfunction in Parkinson's  
567 disease. *Ann Neurol.* 2020;
- 568 32. Franceschini N, Kirschfeld K. Les phénomènes de pseudopupille dans  
569 l'œil composé de *Drosophila*. *Kybernetik.* 1971;9:159–82.
- 570 33. Gupta H V., Zhang N, Driver-Dunckley E, Mehta SH, Beach TG, Adler CH.  
571 Contrast Acuity With Different Colors in Parkinson's Disease. *Mov Disord*  
572 *Clin Pract.* 2019;6:672–7.
- 573 34. Monti JM, Monti D. The involvement of dopamine in the modulation of  
574 sleep and waking. *Sleep Med Rev.* 2007;11:113–33.
- 575 35. Sitaraman D, Aso Y, Rubin GM, Nitabach MN. Control of Sleep by  
576 Dopaminergic Inputs to the *Drosophila* Mushroom Body. *Front Neural*  
577 *Circuits.* 2015;9:73.
- 578 36. Dubowy C, Sehgal A. Circadian Rhythms and Sleep in *Drosophila*  
579 *melanogaster*. *Genetics.* 2017;205:1373–97.
- 580 37. Helfrich-Förster C. Sleep in Insects. *Annu Rev Entomol.* 2018;63:69–86.
- 581 38. Hirsh J, Riemensperger T, Coulom H, Iche M, Coupar J, Birman S. Roles of  
582 Dopamine in Circadian Rhythmicity and Extreme Light Sensitivity of  
583 Circadian Entrainment. *Curr Biol.* 2010;20:209–14.
- 584 39. Shohamy D, Adcock RA. Dopamine and adaptive memory. *Trends Cogn*  
585 *Sci.* 2010;14:464–72.
- 586 40. Cognigni P, Felsenberg J, Waddell S. Do the right thing: neural network  
587 mechanisms of memory formation, expression and update in *Drosophila*.  
588 *Curr Opin Neurobiol.* 2018;49:51–8.
- 589 41. Takemura S ya, Aso Y, Hige T, Wong A, Lu Z, Xu CS, et al. A connectome  
590 of a learning and memory center in the adult *Drosophila* brain. *Elife.* 2017;6:1–  
591 43.
- 592 42. Montague SA, Baker BS. Memory elicited by courtship conditioning

- 593 requires mushroom body neuronal subsets similar to those utilized in  
594 appetitive memory. *PLoS One*. 2016;11:1–24.
- 595 43. Eguchi T, Kuwahara T, Sakurai M, Komori T, Fujimoto T, Ito G, et al.  
596 LRRK2 and its substrate Rab GTPases are sequentially targeted onto stressed  
597 lysosomes and maintain their homeostasis. *Proc Natl Acad Sci*.  
598 2018;115:E9115–24.
- 599 44. Rivero-ríos P, Romo-lozano M, Fernández B, Fdez E. Distinct roles for  
600 RAB10 and RAB29 in pathogenic LRRK2-mediated endolysosomal trafficking  
601 alterations. *Cells*. 2020;9.
- 602 45. Liu Z, Xu E, Zhao HT, Cole T, West AB. LRRK2 and Rab10 Coordinate  
603 Macropinocytosis to Mediate Immunological Responses in Phagocytes. *EMBO*  
604 *J*. 2020;e104862:1–21.
- 605 46. Dhekne HS, Yanatori I, Gomez RC, Tonelli F, Diez F, Schüle B, et al. A  
606 pathway for Parkinson’s Disease LRRK2 kinase to block primary cilia and  
607 Sonic hedgehog signaling in the brain. *Elife*. 2018;7:1–26.
- 608 47. Ordóñez AJL, Fernández B, Fdez E, Romo-Lozano M, Madero-Pérez J,  
609 Lobbestael E, et al. RAB8, RAB10 and RILPL1 contribute to both LRRK2  
610 kinase-mediated centrosomal cohesion and ciliogenesis deficits. *Hum Mol*  
611 *Genet*. 2019;
- 612 48. Wauters F, Cornelissen T, Imberechts D, Martin S, Koentjoro B, Sue C, et al.  
613 LRRK2 mutations impair depolarization-induced mitophagy through  
614 inhibition of mitochondrial accumulation of RAB10. *Autophagy*. 2019;16:203–  
615 22.
- 616 49. Beilina A, Bonet-Ponce L, Kumaran R, Kordich JJ, Ishida M, Mamais A, et  
617 al. The Parkinson’s Disease Protein LRRK2 Interacts with the GARP Complex  
618 to Promote Retrograde Transport to the trans-Golgi Network. *Cell Rep*.  
619 2020;31.
- 620 50. Nakamura Y, Ochi Y, Satoh T, Satoh AK. Crag/Rab10/Ehbp1 regulate the  
621 basolateral transport of Na + K + ATPase in *Drosophila* photoreceptors. *J Cell*

- 622 Sci. 2020;133:jcs.238790.
- 623 51. Lin C-H, Li H, Lee Y-N, Cheng Y-J, Wu R-M, Chien C-T. Lrrk regulates the  
624 dynamic profile of dendritic Golgi outposts through the golgin Lava lamp. J  
625 Cell Biol. 2015;210:471–83.
- 626 52. Kuwahara T, Inoue K, D'Agati VD, Fujimoto T, Eguchi T, Saha S, et al.  
627 LRRK2 and RAB7L1 coordinately regulate axonal morphology and lysosome  
628 integrity in diverse cellular contexts. Sci Rep. 2016;6:29945.
- 629 53. Schapansky J, Khasnavis S, DeAndrade MP, Nardoizzi JD, Falkson SR,  
630 Boyd JD, et al. Familial knockin mutation of LRRK2 causes lysosomal  
631 dysfunction and accumulation of endogenous insoluble  $\alpha$ -synuclein in  
632 neurons. Neurobiol Dis. 2018;111:26–35.
- 633 54. Rivero-Ríos P, Romo-Lozano M, Fasiczka R, Naaldijk Y, Hilfiker S.  
634 LRRK2-Related Parkinson's Disease Due to Altered Endolysosomal Biology  
635 With Variable Lewy Body Pathology: A Hypothesis. Front Neurosci.  
636 2020;14:1–16.
- 637 55. Driscoll M, Coleman V, McLaughlin M, Nguyen A, Sitaraman D.  
638 Dopamine neurons promote arousal and wakefulness via Dop1R receptor in  
639 the *Drosophila* mushroom body. bioRxiv. 2020;2020.04.29.069229.
- 640 56. Potdar S, Sheeba V. Wakefulness Is Promoted during Day Time by PDFR  
641 Signalling to Dopaminergic Neurons in *Drosophila melanogaster*. eNeuro.  
642 2018;5:ENEURO.0129-18.2018.
- 643 57. Soukup SF, Kuenen S, Vanhauwaert R, Manetsberger J, Hernández-Díaz S,  
644 Swerts J, et al. A LRRK2-Dependent EndophilinA Phosphoswitch Is Critical  
645 for Macroautophagy at Presynaptic Terminals. Neuron. 2016;92:829–44.
- 646
- 647

648 **Figure legends**

649 **Fig. 1. Validation of Rab10 depletion and phosphorylation *in vivo*.** A. A  
650 pan-hRab10 antibody detects dRab10 and shows that Rab10 is increased by  
651 neuronal (nSyb-GAL4) expression of UAS-*Rab10*, abolished in the Rab10<sup>-</sup>  
652 null, and substantially reduced by neuronal expression of *Rab10<sup>RNAi</sup>*.  
653 Antibody-specificity was confirmed by rat CNS binding. B. A phospho-  
654 hRab10 antibody detects phospho-dRab10, which is increased by neuronal  
655 expression of UAS-*Rab10*, but undetectable with the Rab10<sup>-</sup> null or with  
656 neuronal expression of *Rab10<sup>RNAi</sup>*. C. Validation of deGradFP technique. In  
657 flies where endogenous *Rab10* has been replaced by *YFP-Rab10*, global (Act5c-  
658 GAL4) or neuronal expression of the vhhGFP nanobody reduces the level of  
659 YFP-Rab10 by ~50%. A slightly smaller reduction is achieved by neuronal  
660 expression of *GFP<sup>RNAi</sup>*. D. Neuronal expression of *Rab10* increases pRab10, as  
661 does neuronal expression of *LRRK2-G2019S*. Neuronal expression of a kinase-  
662 dead *LRRK2* (*KD*, *LRRK2-G2019S-K1906M*) has no effect on the  
663 phosphorylation of Rab10. B. Quantification of the Western blots in the  
664 corresponding panels of A. Loading control:  $\alpha$ -drosophila-synaptotagmin ( $\alpha$ -  
665 syt). Exact genotypes and in Table S2.

666 **Fig. 2. *Rab10* knock-down rescues *LRRK2-G2019S* -induced bradykinesia.**  
667 **A. Optogenetic stimulation of the Proboscis Extension Response (PER).** Ai.  
668 To reach for food or liquid, the fly extends its proboscis in response to an  
669 optogenetic stimulus to sensory neurons on the legs. The full extension  
670 response is shown in Movie M1. Aii Expression of *LRRK2-G2019S* in  
671 dopaminergic neurons (*THG2*) reduces the proportion of flies that respond to  
672 a single flash of light, and this is rescued by Rab10 reduction with *Rab10<sup>RNAi</sup>*.  
673 Aiii. Dopaminergic reduction in Rab10 rescues the bradykinesia (slower  
674 response) of flies expressing *G2019S* in their dopaminergic neurons. Aiii. Raw  
675 traces; Aiv. mean data. To respond to the optogenetic stimuli all flies carry  
676 *LexA/Op Gr5a>ReachR*. **B. Sucrose stimulation of the PER.** Bi. Flies expressing  
677 *G2019S* in their dopaminergic neurons (*THG2*, magenta bars) respond less  
678 frequently to sucrose than wild-type flies (green) i.e. they show akinesia. This



679 is rescued in *THG2* flies with dopaminergic reduction in Rab10 using  
680 *Rab10<sup>RNAi</sup>* (*THG2 > Rab10<sup>RNAi</sup>*). Bii Reduction of dopaminergic Rab10 with the  
681 deGradFP technique (*Rab10 GFP; THG2>vhhGFP*, yellow bars) also rescues  
682 the *G2019S*-induced akinesia. Biii. The Rab10 null (*Rab10<sup>-</sup>*, orange bar) also  
683 reverts the *G2019S* deficit, while expression of *Rab10* in the null background  
684 again induces akinesia (*Rab10<sup>-</sup>; TH > Rab10*, light blue bar). Biv. By itself,  
685 *Rab10* expression phenocopies *THG2*. Exact genotypes and full statistical data  
686 in Table S3.

687 **Fig. 3. Visual degeneration due to *LRRK2-G2019S* is rescued by**  
688 **dopaminergic knock-down of *Rab10*. A. Anatomically, dopaminergic *Rab10***  
689 **knock-down rescues the loss of eye structure.** Ai. Healthy flies have a  
690 marked DPP (Deep-Pseudo-Pupil) which can be seen when the eye is  
691 illuminated from underneath. Light passing directly through the eye is focused  
692 towards the observer, but light at an angle is blocked by the pigmentation in  
693 the ommatidia. Aii-Aiv. PD-mimic flies (*THG2; vhhGFP*) kept in the dark for  
694 14 days lose their focused DPP as the eyes show an increased number of  
695 ommatidia transmitting light, spread over a wider area, with the loss of  
696 pigmentation indicating lysosomal dysfunction. Much less degeneration is  
697 seen when Rab10 is depleted using the deGradFP technique (*YFP-Rab10;*  
698 *THG2; vhhGFP* flies). B. **Physiologically, dopaminergic *Rab10* knock-down**  
699 **rescues neuronal vision.** Bi. Degeneration is accelerated by a mild visual  
700 stress achieved by keeping the flies in ‘disco-chambers’ where the light is  
701 turned on and off approximately every 2 seconds; these flies were compared  
702 with those kept in the dark. Bii-iii. Flies kept in the dark have normal visual  
703 responses after 7 days. However, *THG2* flies in disco chambers lose their  
704 physiological response after 7 days (hatched magenta bar, controls in green).  
705 This is rescued by deGradFP mediated knockdown of Rab10 protein (Bi,  
706 *Rab10 GFP; THG2; vhhGFP* hatched yellow bar) or by dopaminergic knock-  
707 down of Rab10 by *RNAi* (Bii, *THG2 > Rab10RNAi* yellow bar). Exact  
708 genotypes and statistical data in Table S3.

709 **Fig 4. *Rab10* knock-down does not rescue sleep deficits induced by**  
710 **dopaminergic expression of *LRRK2-G2019S*.** A. There is no effect of *LRRK2-*  
711 *G2019S* or *Rab10* expression on circadian period in continuous darkness (DD),  
712 and only a small reduction in circadian period when both genes are  
713 expressed. Ai. Raw actograms; Aii mean period from days 6-9 in DD. B. In  
714 Light/dark (LD), *THG2* flies show increased sleep during the day, and  
715 reduced sleep at night. Neither reduced nor increased expression of *Rab10*  
716 affects the daily pattern of sleep (Bi), with summary data in Bii. Sleep is  
717 defined as periods of inactivity longer than 5 min. Exact genotypes and  
718 statistical results in Table S5.

719 **Fig. 5. Memory depends on dopaminergic *Rab10* but not *LRRK2-G2019S*.** A.  
720 Depletion of *Rab10* in the control background (*TH > Rab10<sup>RNAi</sup>*) increases the  
721 proportion of flies with low memory index (MI) compared to flies with no  
722 transgene expression (*TH/+*). B. Expression of *LRRK2-G2019S* has no effect on  
723 performance; either for the *THG2/+ v TH/+* control flies, nor for the flies with  
724 *Rab10<sup>RNAi</sup>*. Exact genotypes and statistical results in Table S6.

725 **Fig. 6. *LRRK2-G2019S* is found in the cytoplasm of the cell soma and in the**  
726 **synaptic endings of dopaminergic neurons.** A. Confocal stack through the  
727 TH-VUM and DADN neurons in the ventral part of the brain of a *THG2 >*  
728 *mCD8-GFP* fly. Note that *LRRK2* protein is found more in the cytoplasm than  
729 the nucleus, and that there are areas of the cytoplasm with less *LRRK2*  
730 staining. *mCD8-GFP* expression is used to mark dopaminergic neurons. B.  
731 Dopaminergically expressed *Rab10-YFP* is found in the synaptic endings in  
732 the mushroom bodies (MB) and weakly in the fan-shaped body (FB). Stack of  
733 two confocal images. C. *THG2* flies show *LRRK2* protein in the dopaminergic  
734 cell bodies (PPL, THV, DADN) and in the synaptic neuropil, of the mushroom  
735 bodies. Single confocal section with  $\alpha$ -*LRRK2* antibody. Images representative  
736 of at least 3 preparations. Exact genotypes in Table S7.

737 **Movie M1. Extension of the proboscis in response to an optogenetic**  
738 **stimulus.** A flash of blue light is used to excite the *GR5a* sugar-sensitive

739 neurons which leads to the extension of the proboscis. The outline of the fly  
740 (red line) was determined by thresholding. The distance between the fixed  
741 reference point and the lowest point of the proboscis (cyan dots) was  
742 measured automatically on each frame. The recorded trace is shown as the  
743 green line in Fig. 2Aiii. Each frame is 6 ms. Exact genotype: *Gr5a::ReachR* / + ;  
744 +/+.

745

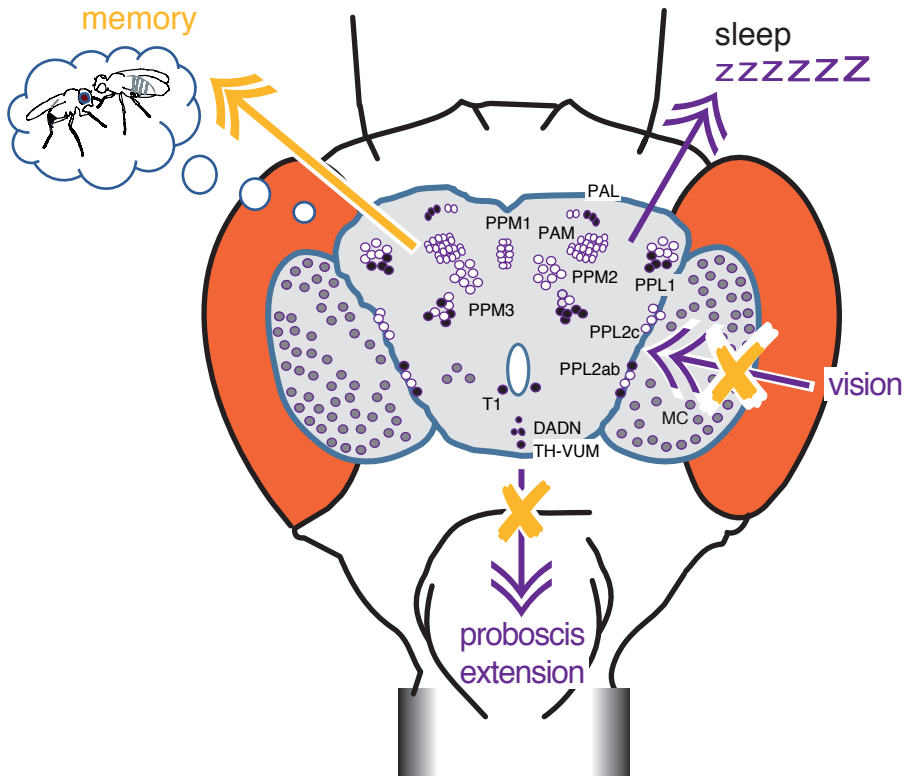

**Ai**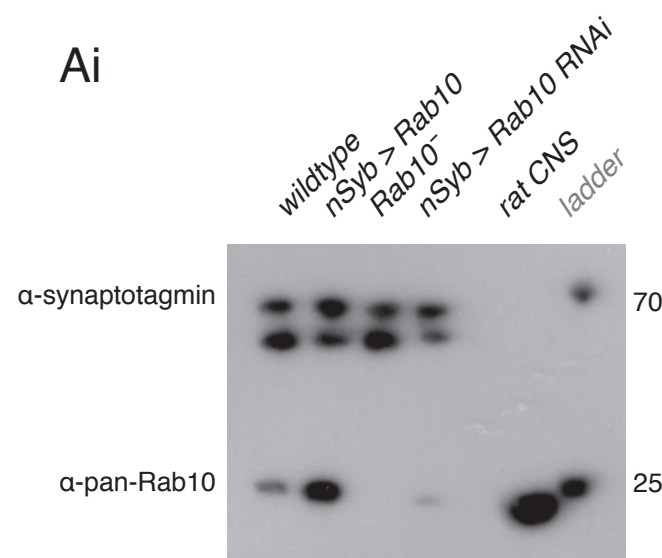**Aii**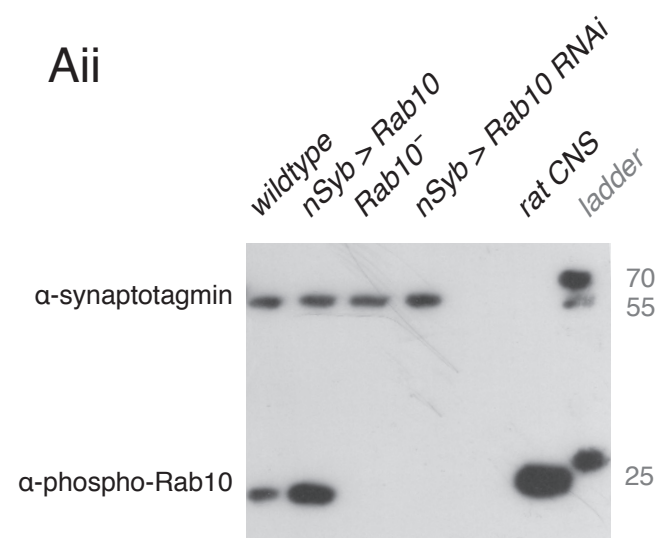**Aiii**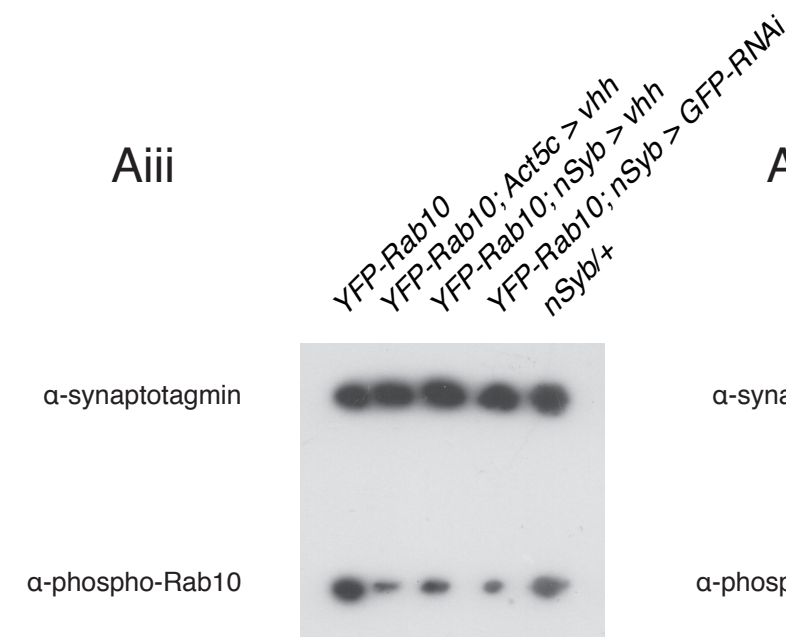**Aiv**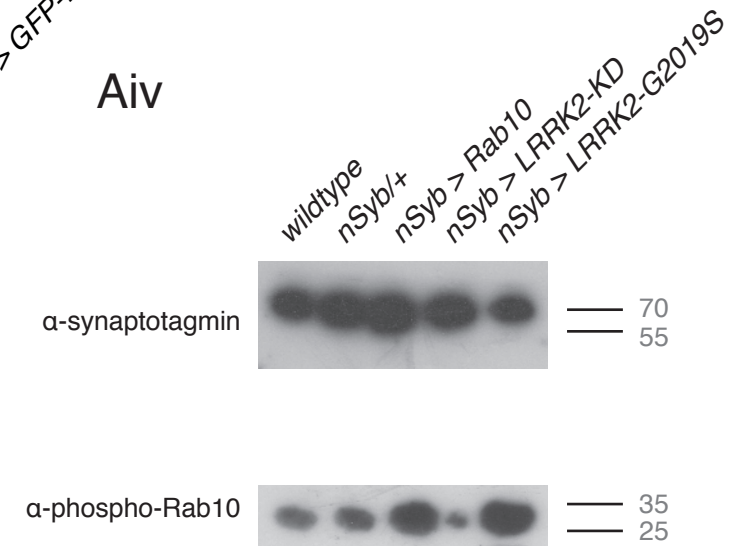**Bi**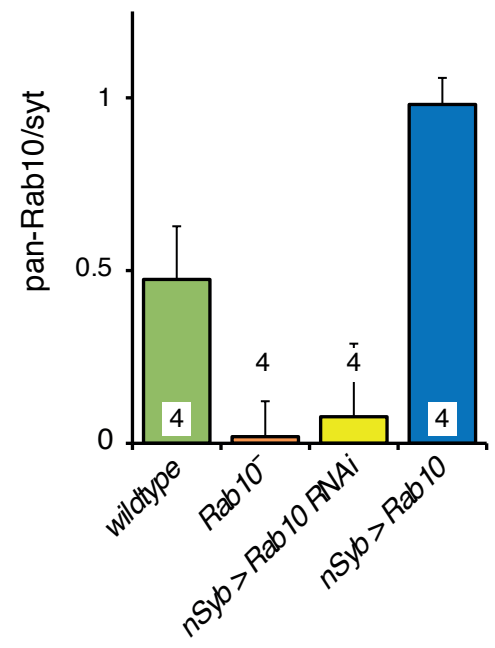**Bii**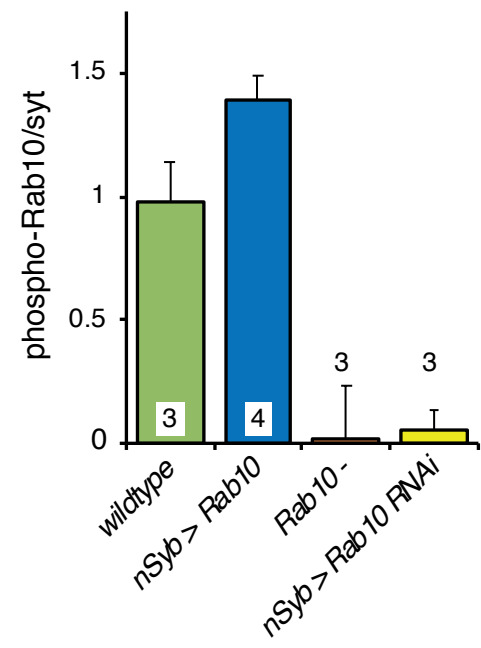**Biii**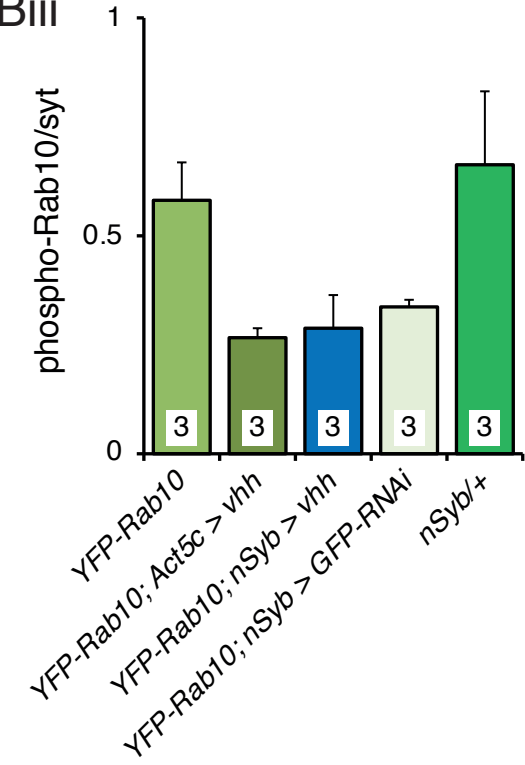**Biv**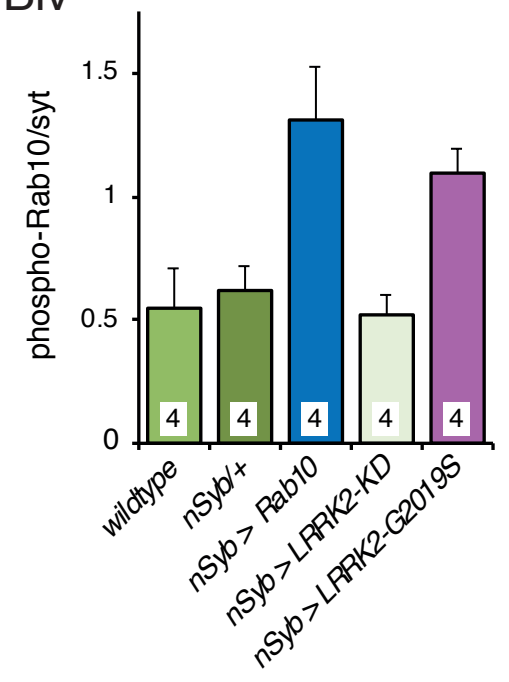

## A Optogenetic (LexA/LexOp) (i)

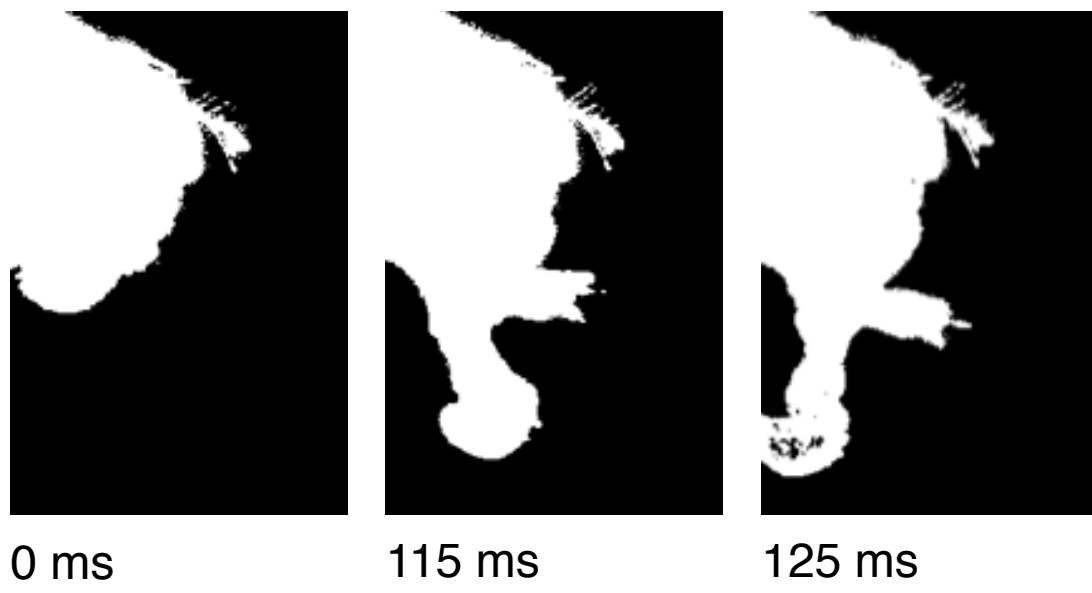

## Aii

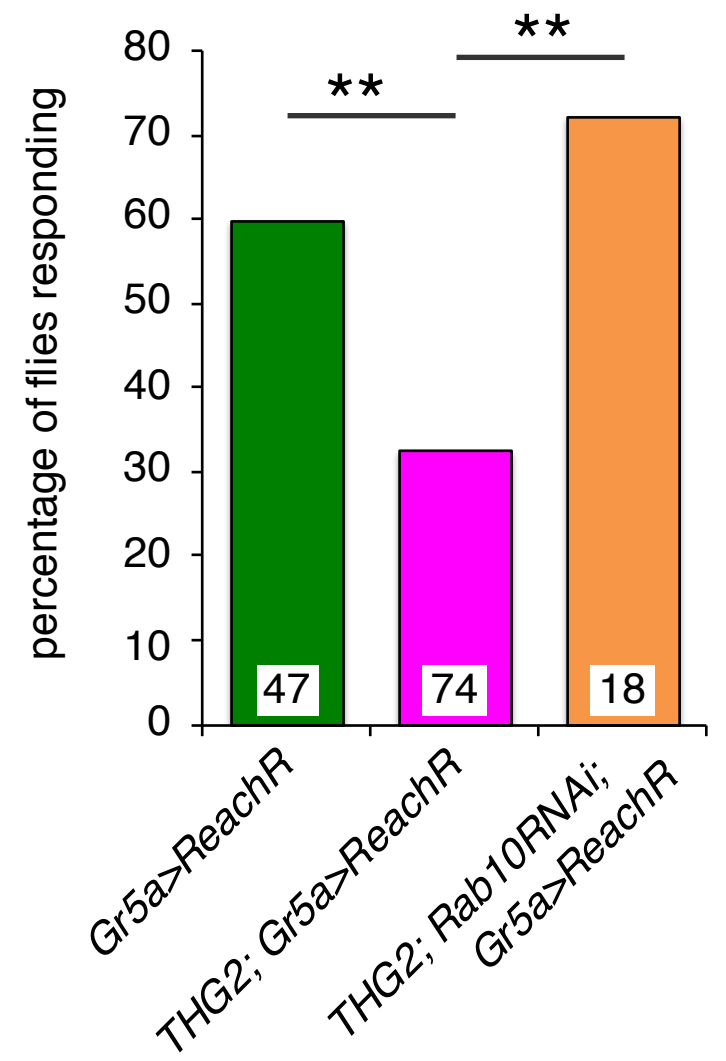

## Aiii

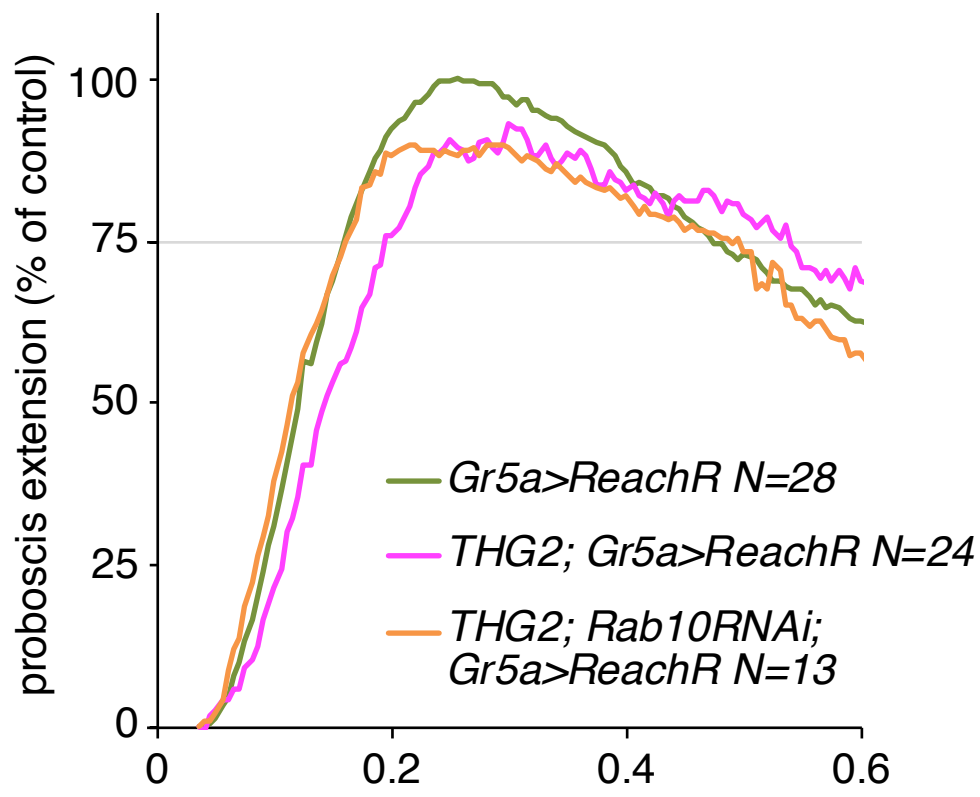

## Aiv

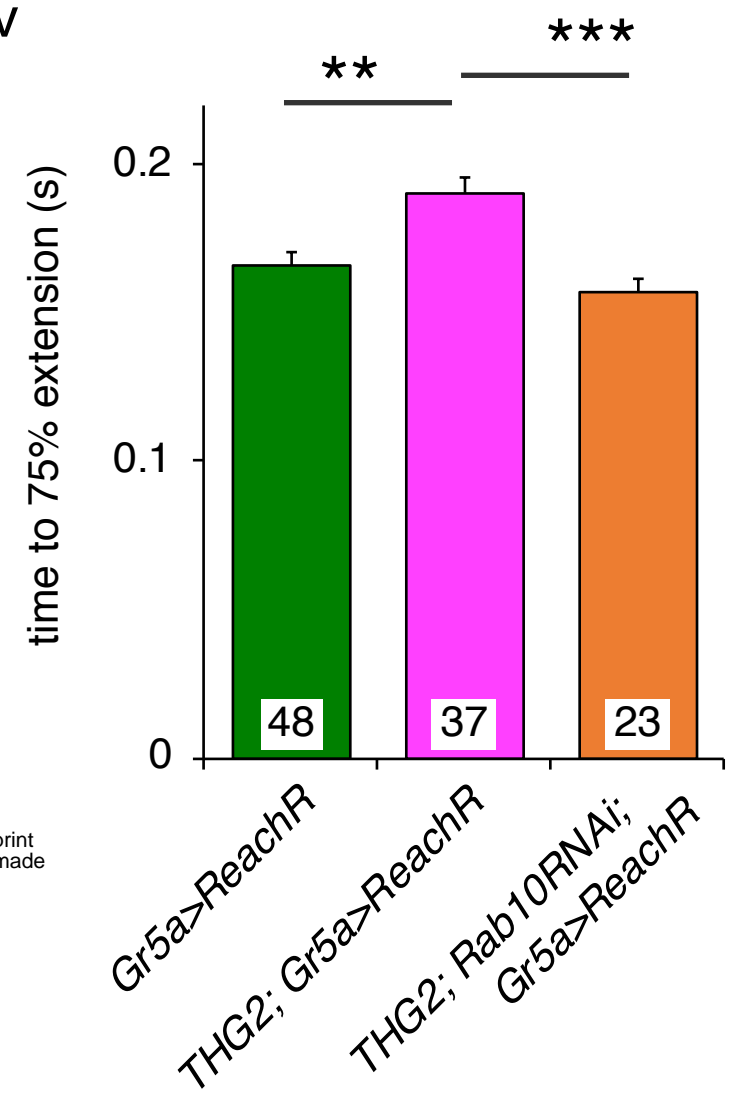

bioRxiv preprint doi: <https://doi.org/10.1101/2020.09.28.316992>; this version posted October 12, 2020. The copyright holder for this preprint (which was not certified by peer review) is the author/funder, who has granted bioRxiv a license to display the preprint in perpetuity. It is made available under aCC-BY 4.0 International license.

## B sucrose

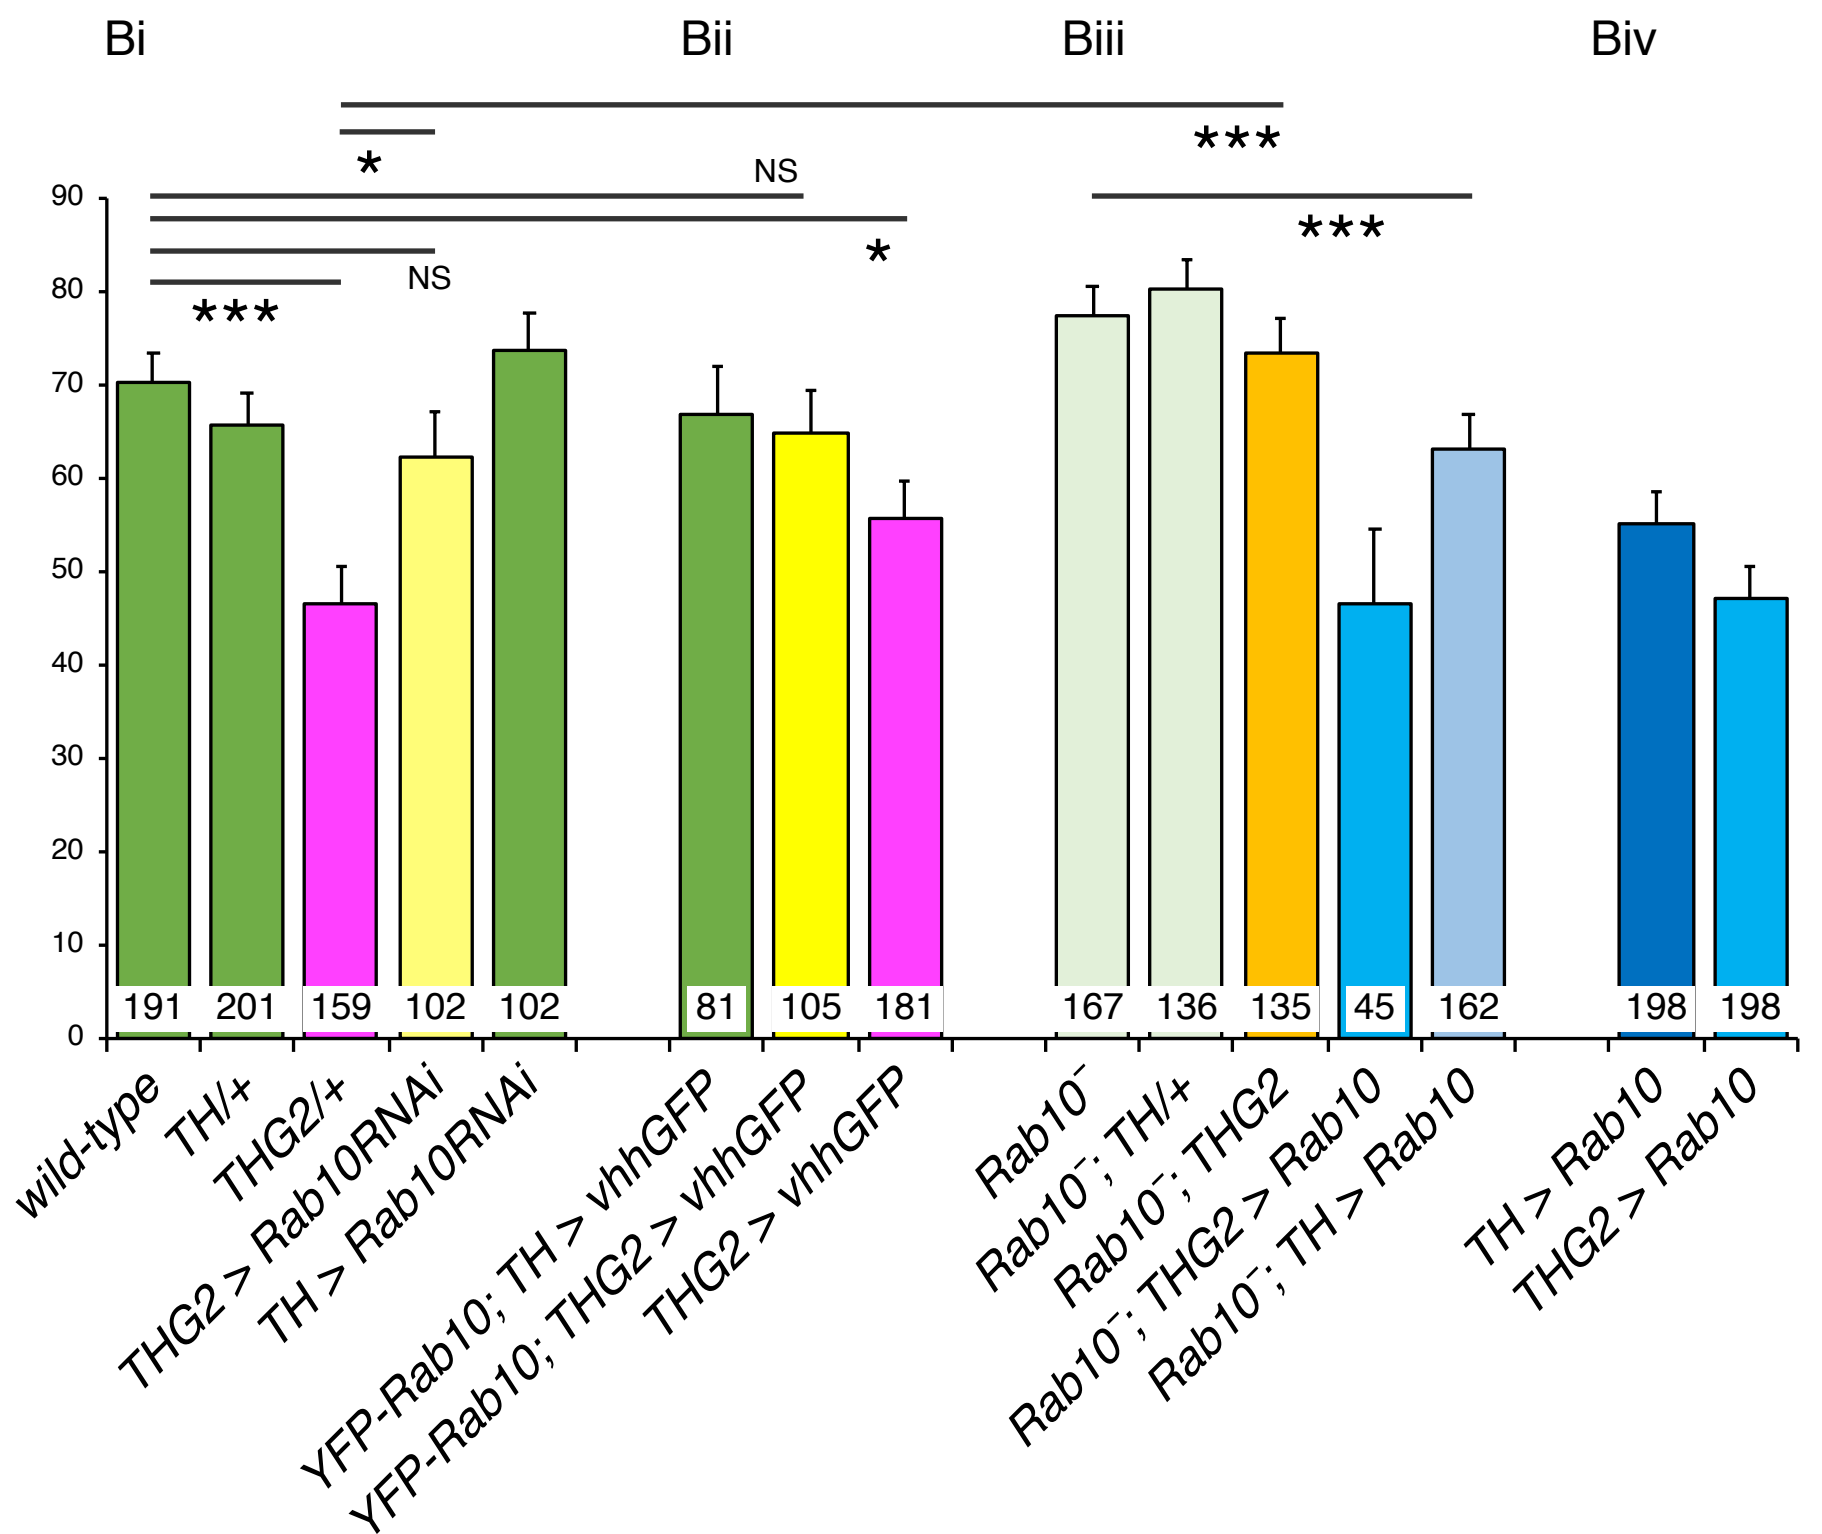



## A Anatomical degeneration

Ai

Aii

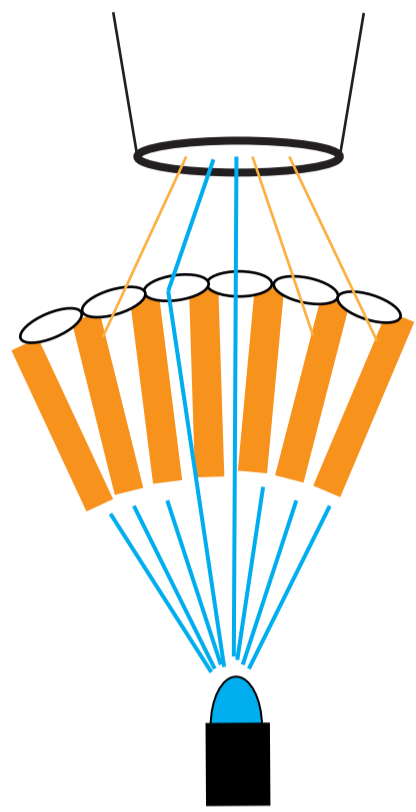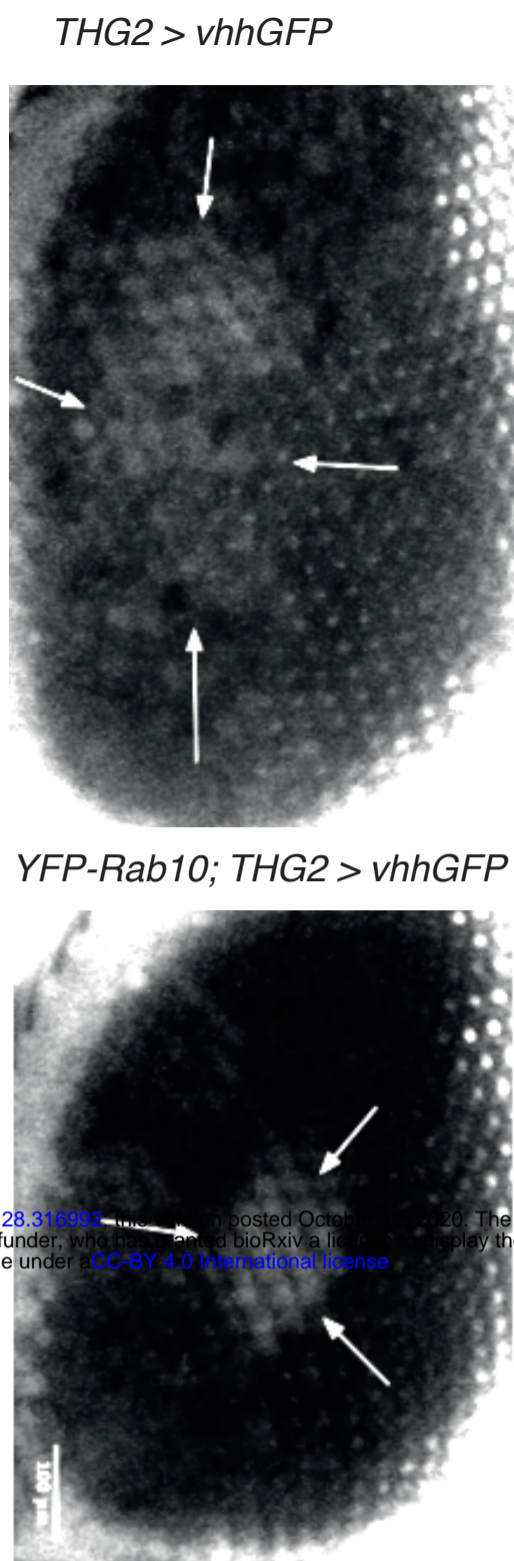

Aiii

Aiv

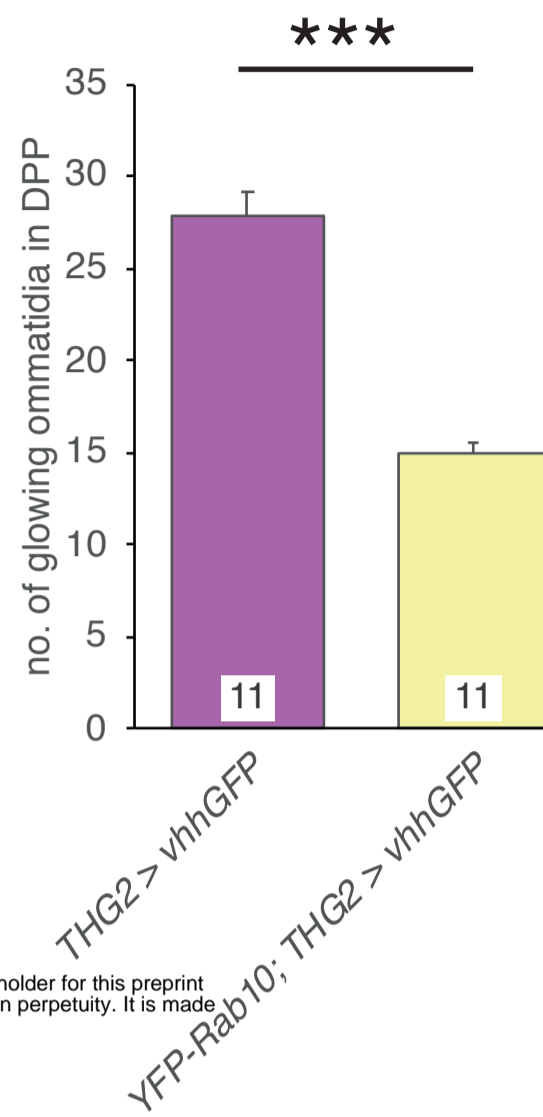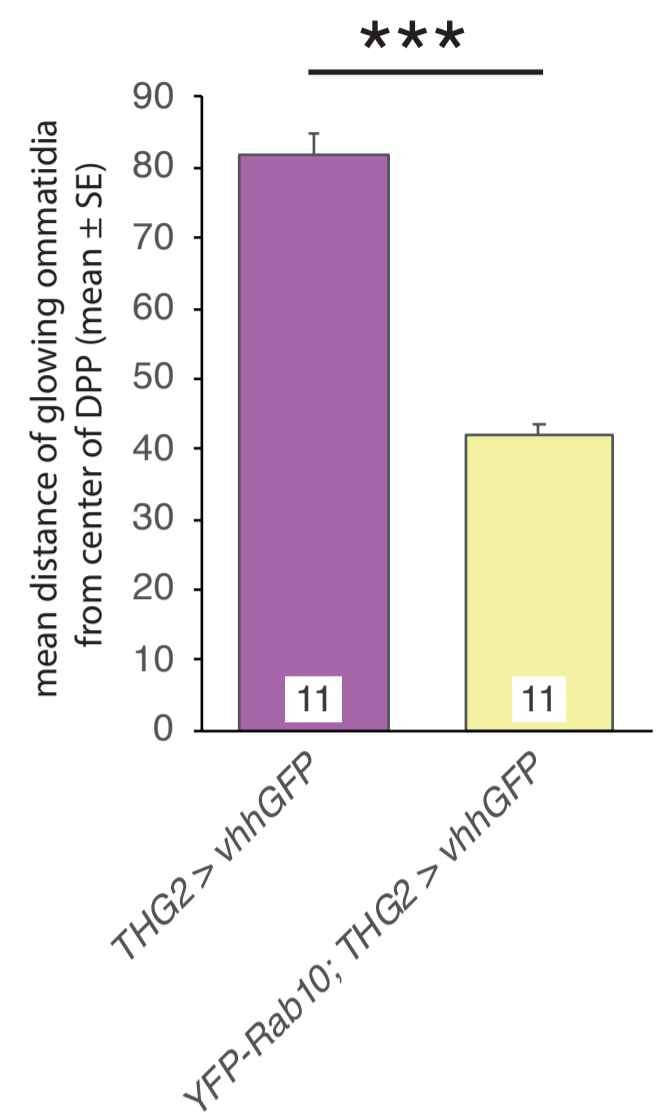

bioRxiv preprint doi: <https://doi.org/10.1101/2020.09.28.316092>; this version posted October 1, 2020. The copyright holder for this preprint (which was not certified by peer review) is the author/funder, who has granted bioRxiv a license to display the preprint in perpetuity. It is made available under aCC-BY 4.0 International license.

## B Physiological degeneration

Bi

Bii

Biii

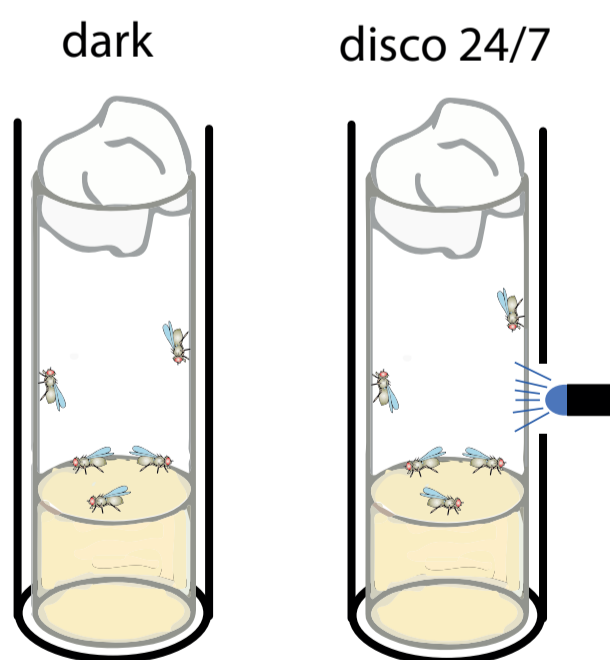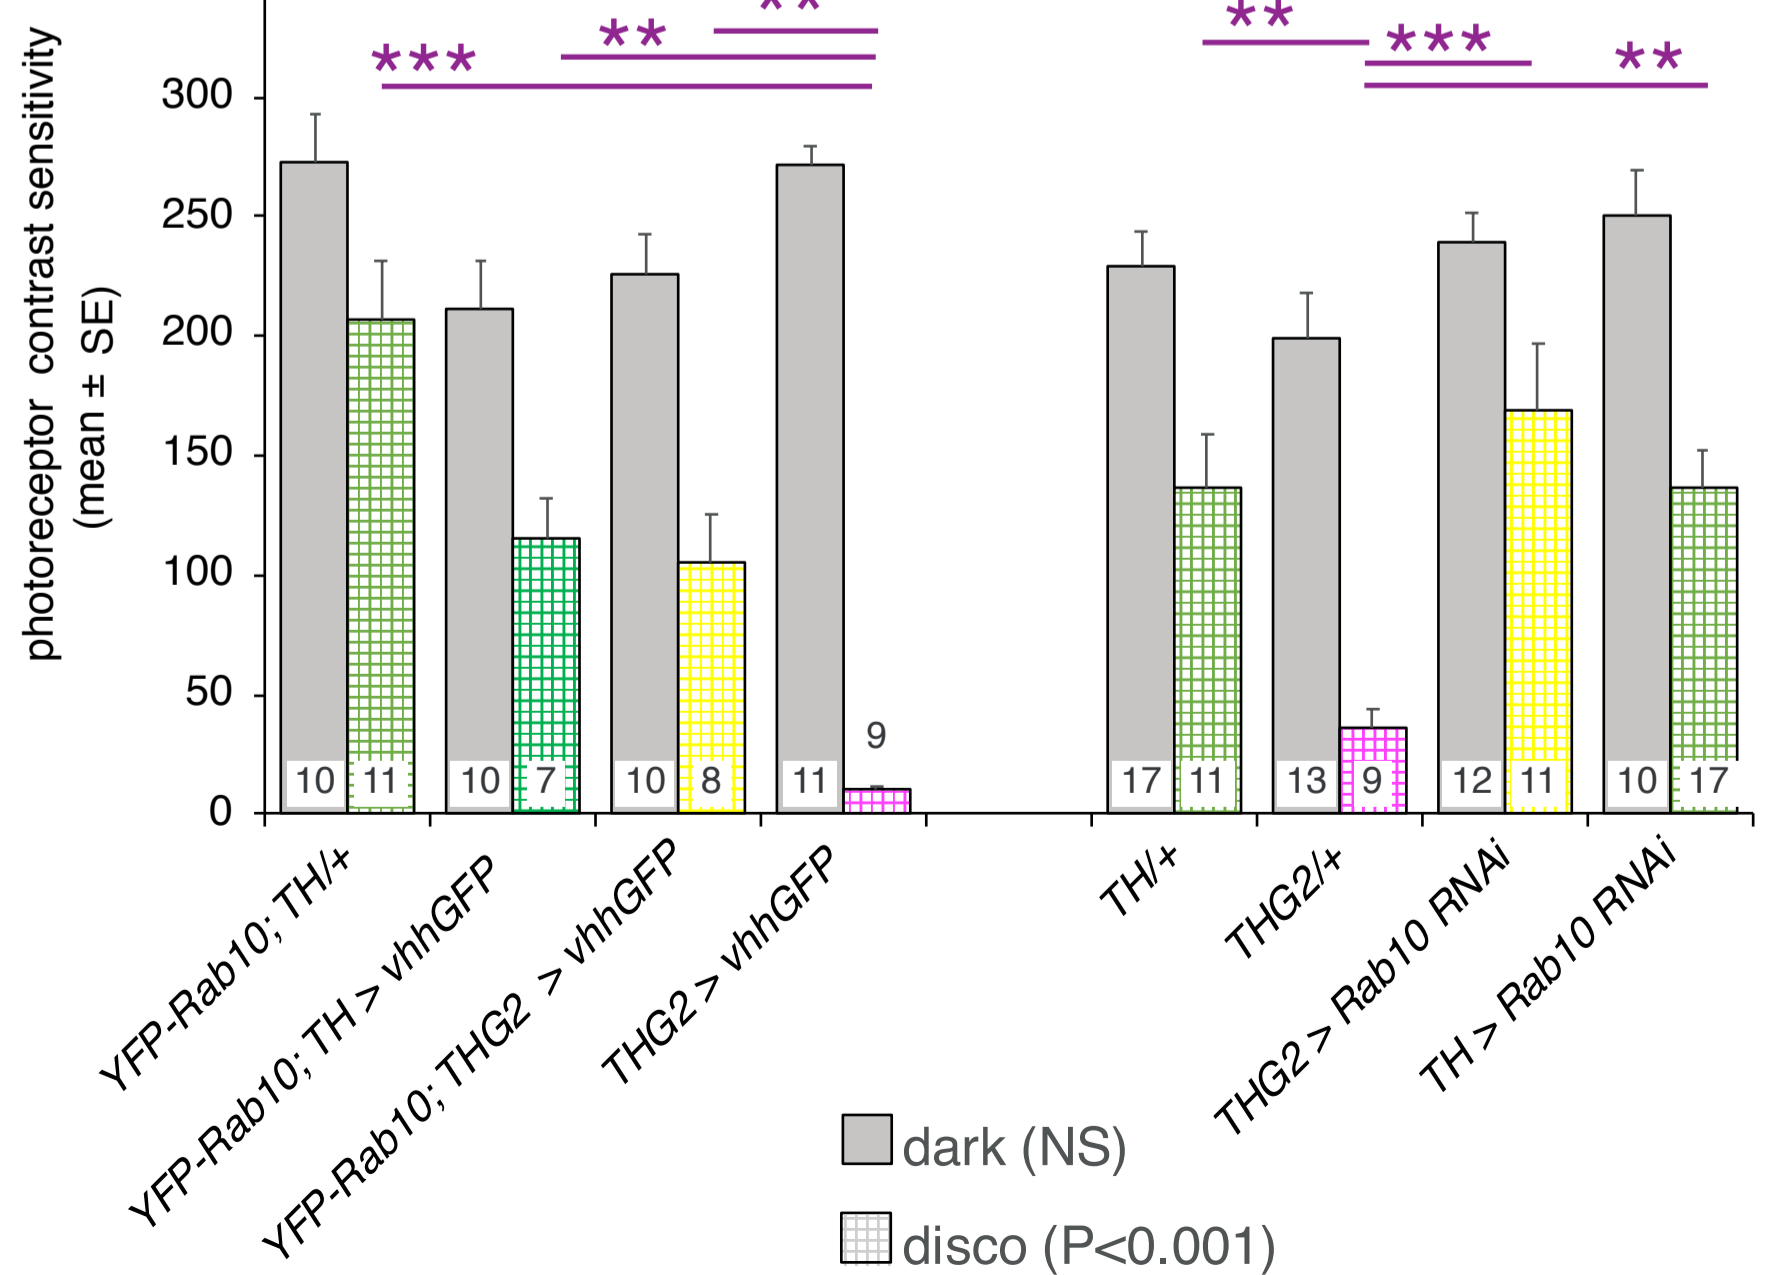

A: DD

Ai

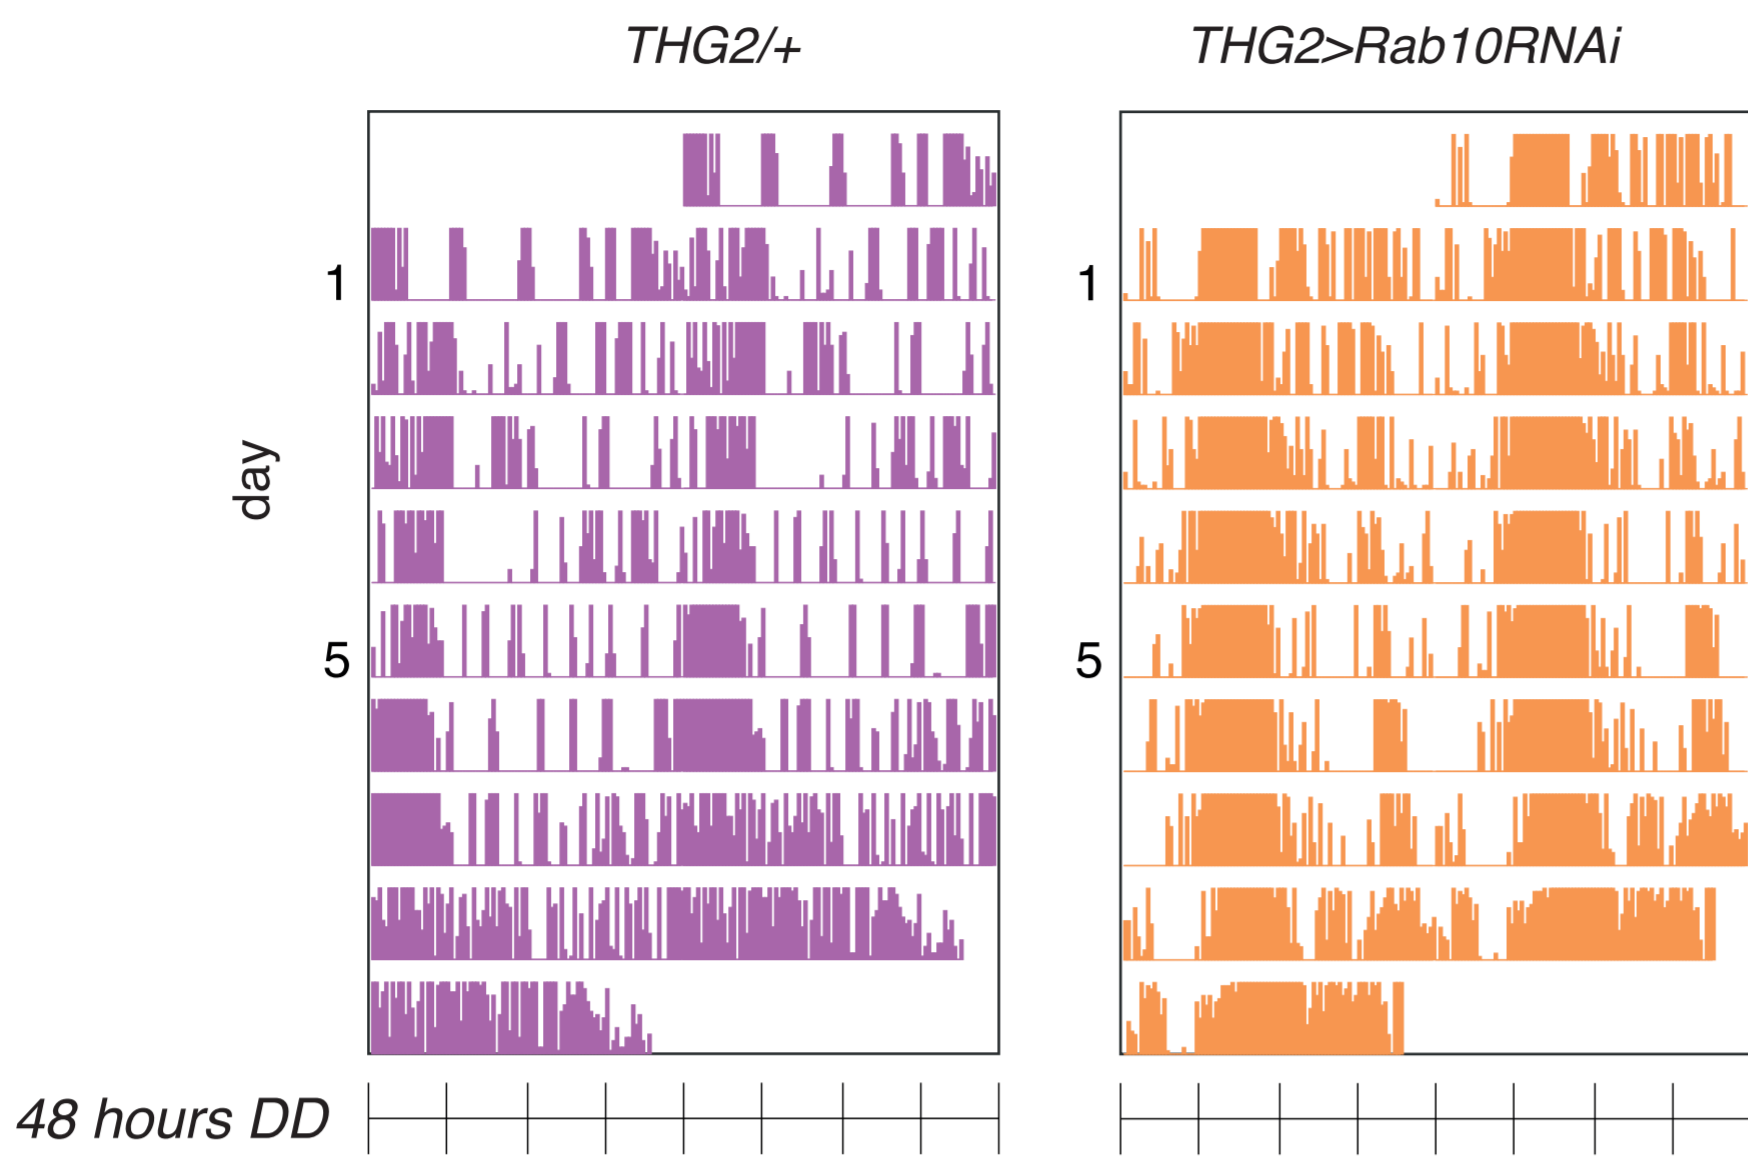

Aii

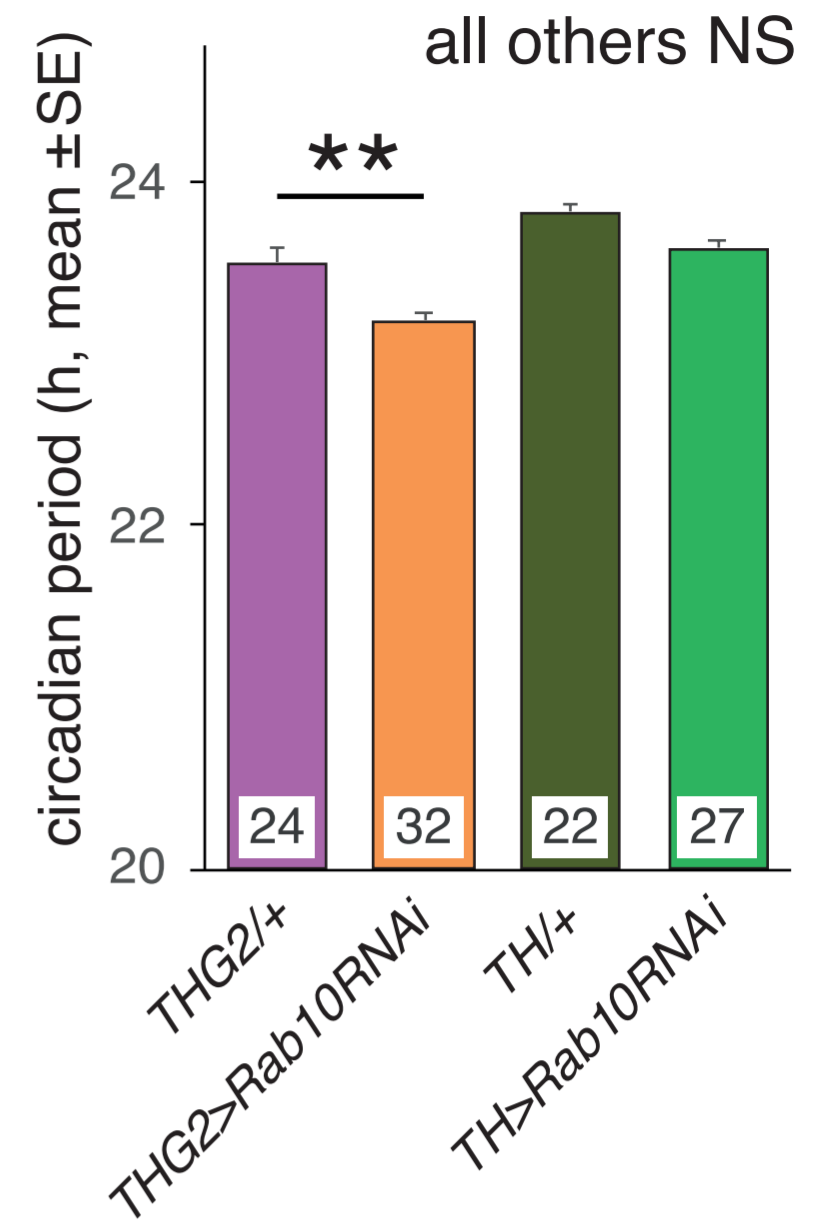

B : LD

Bi

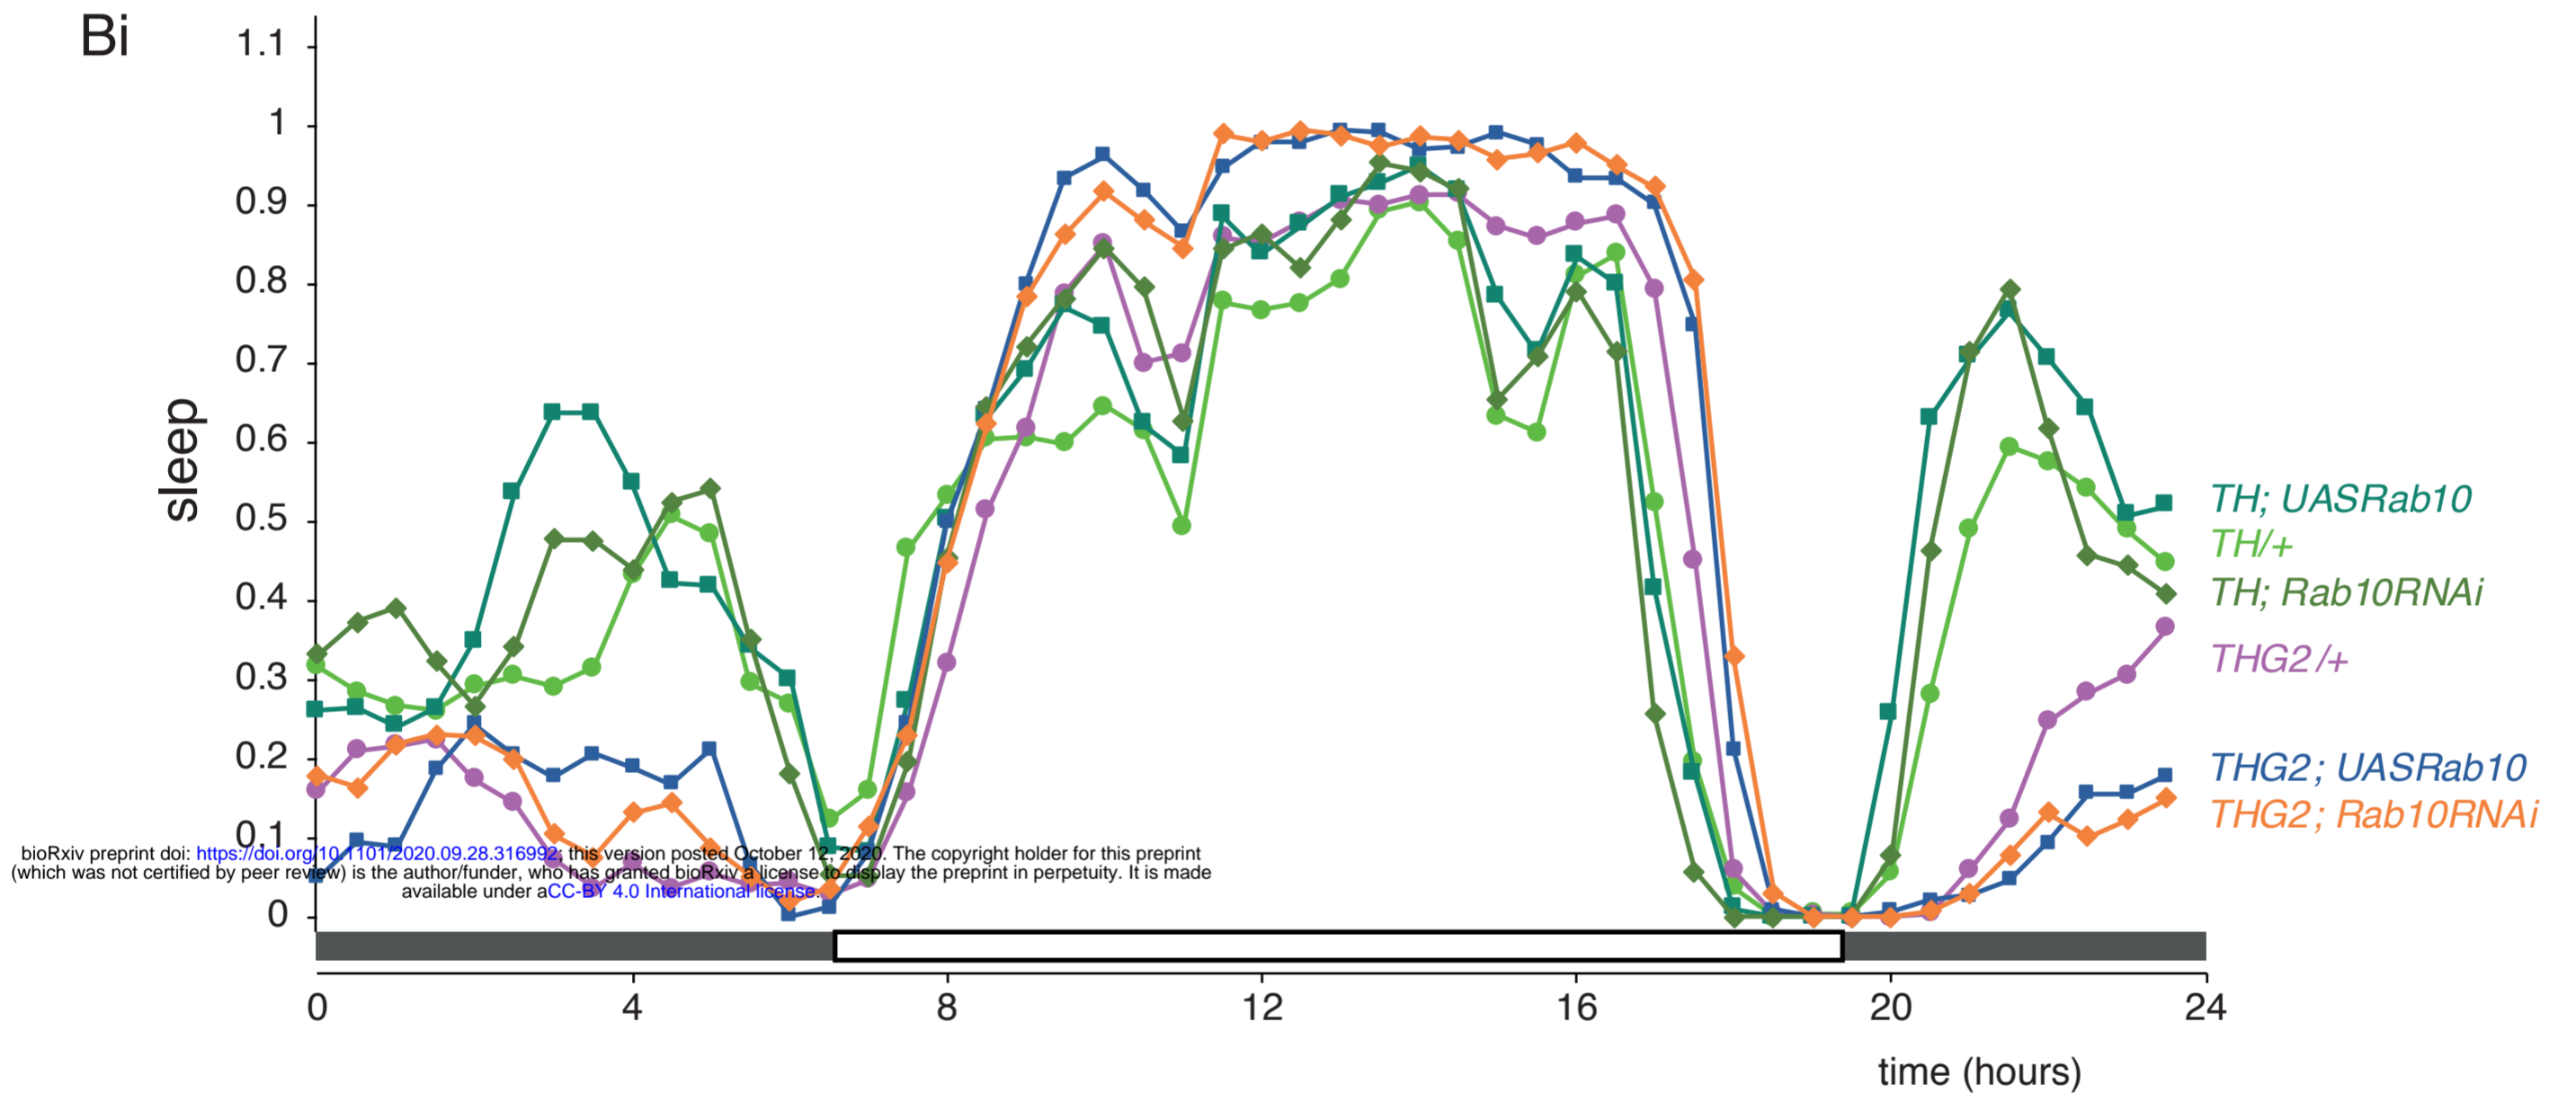

Bii

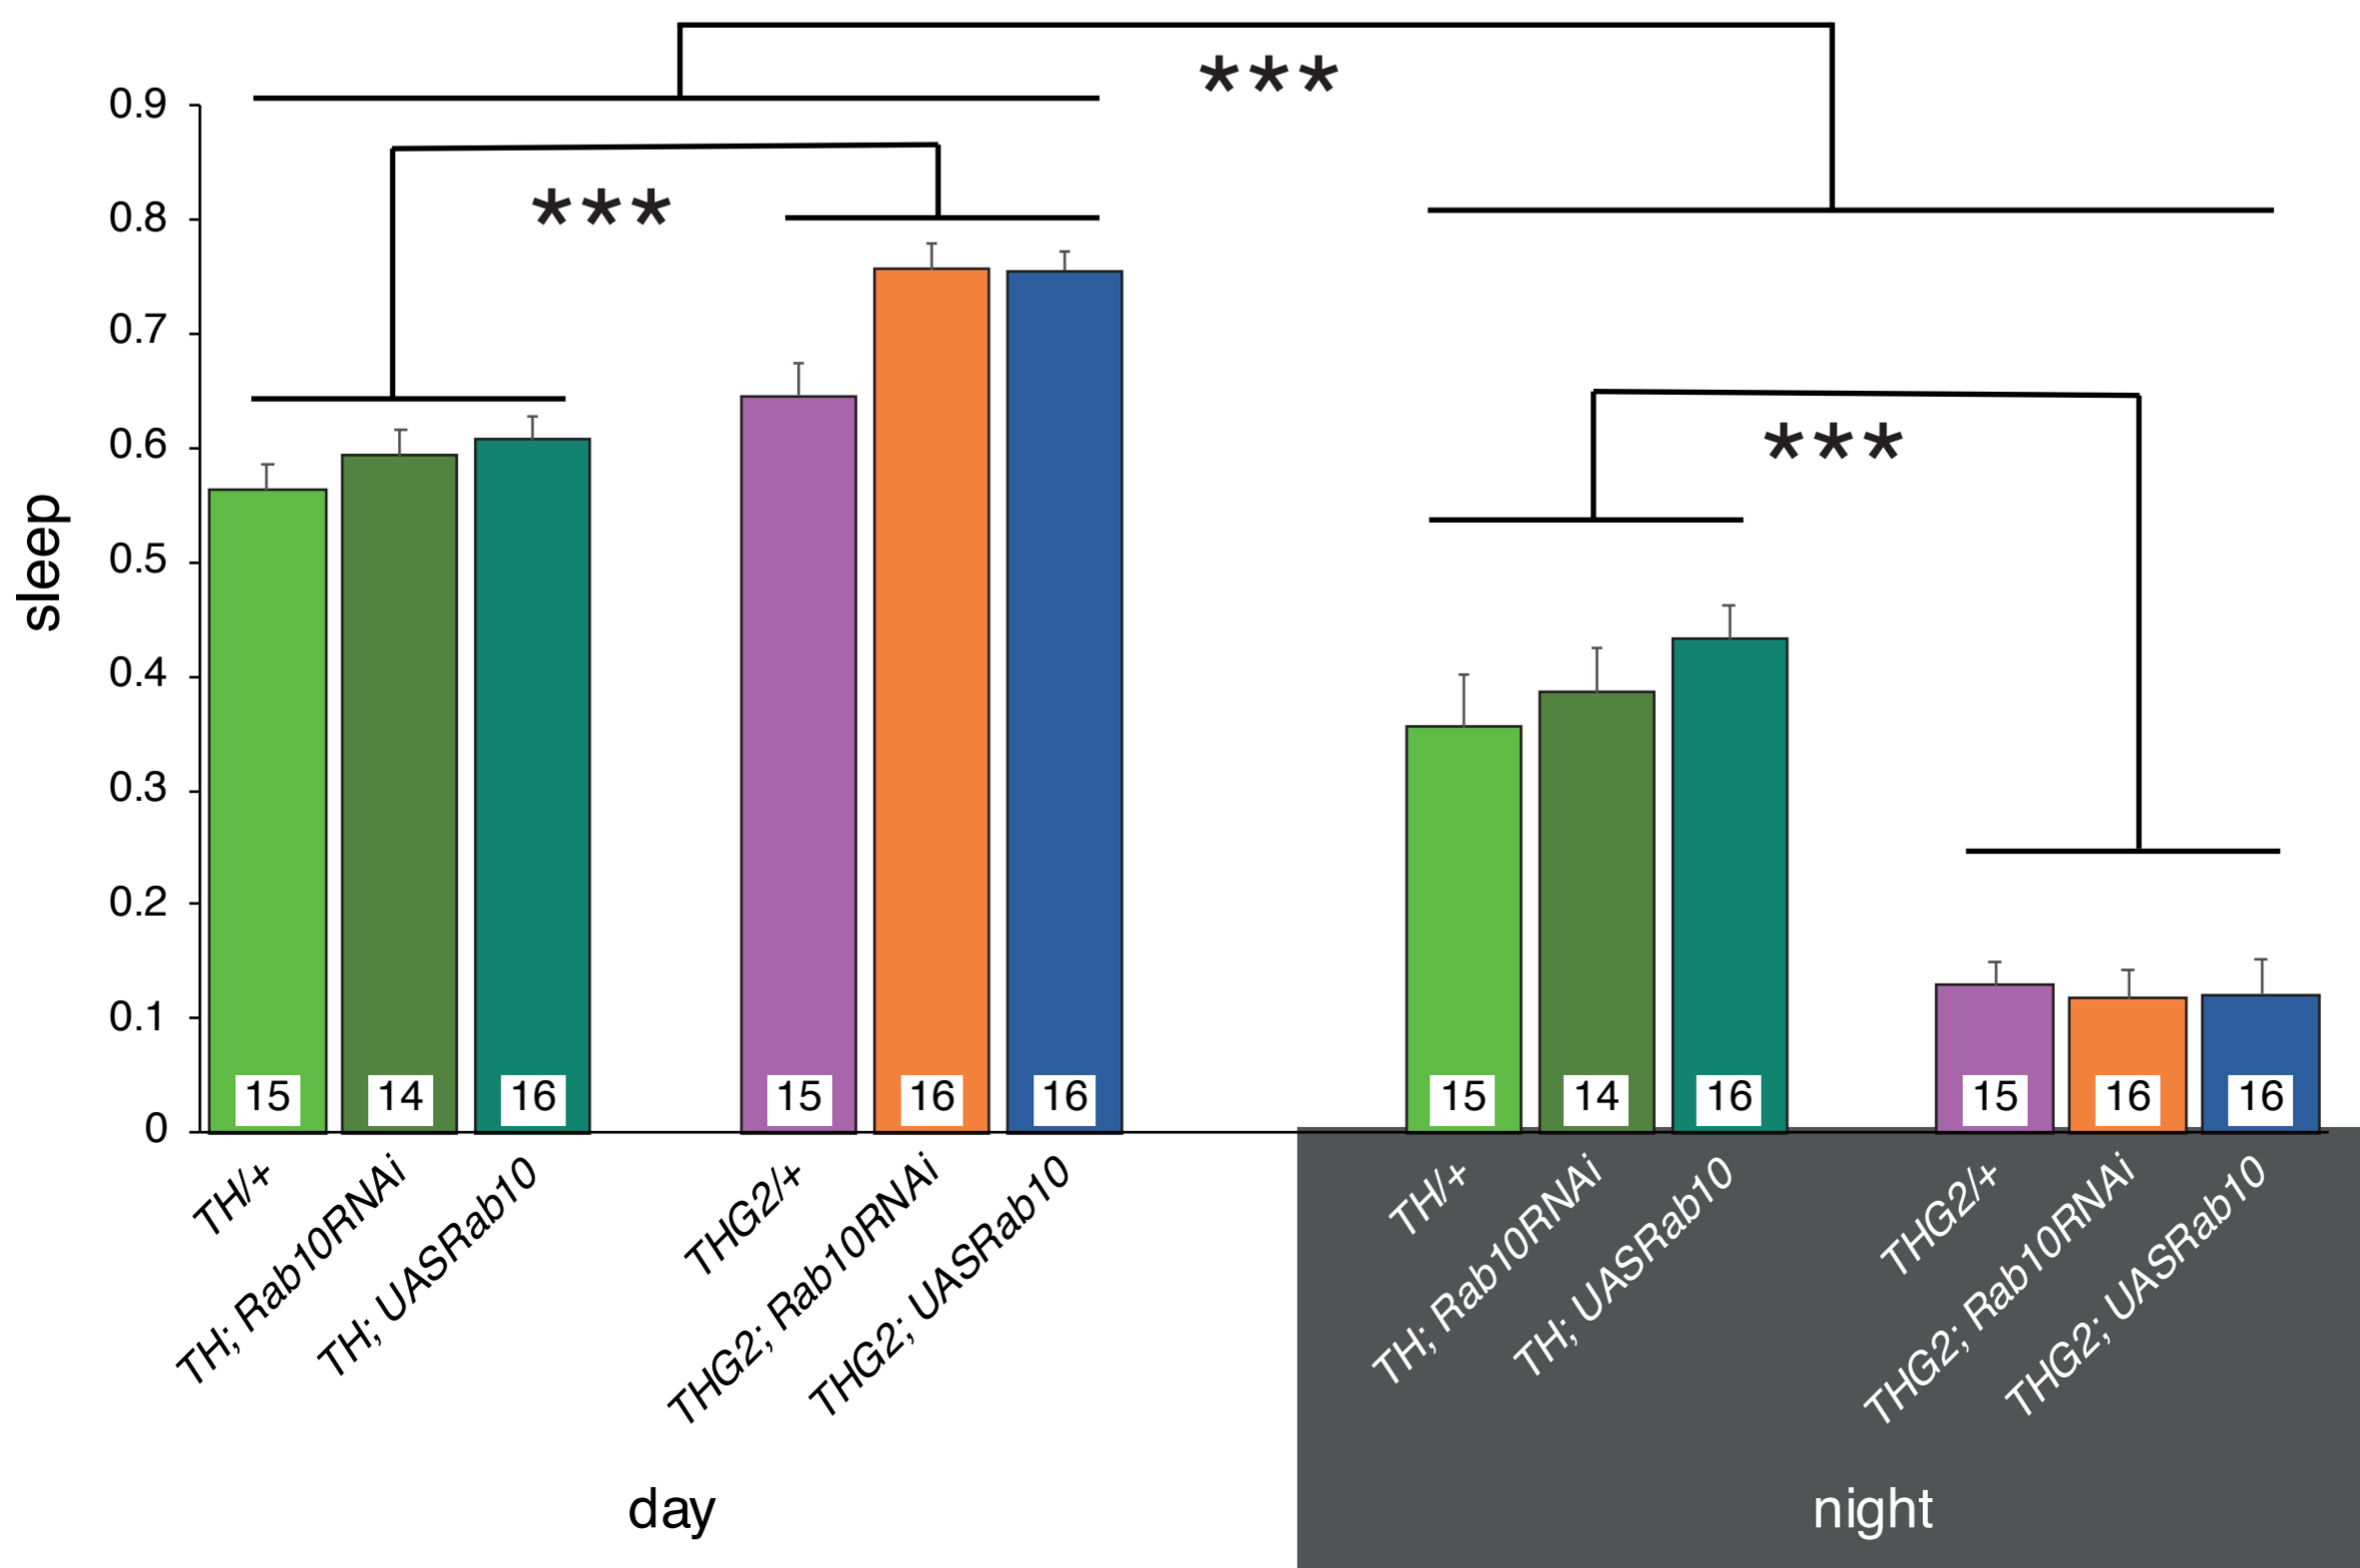



**A**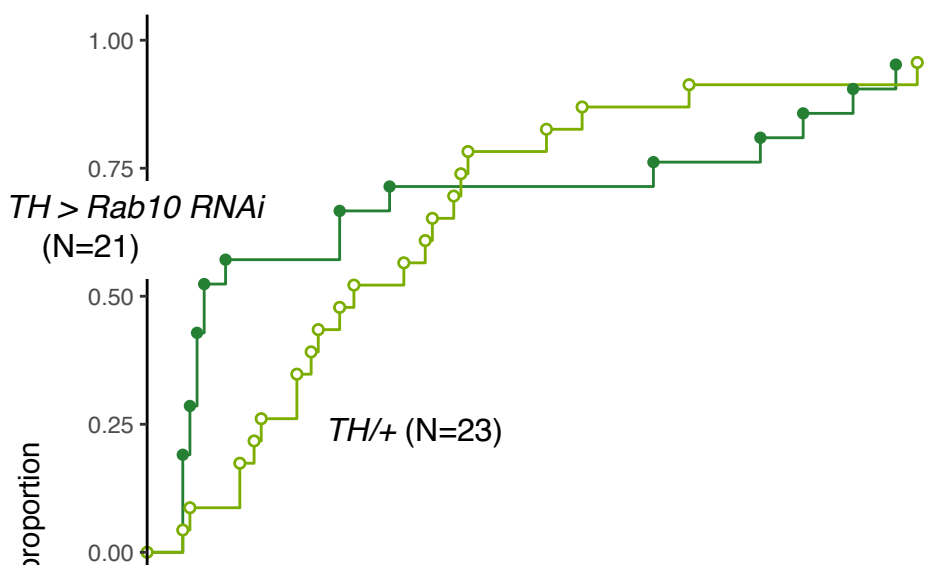**B**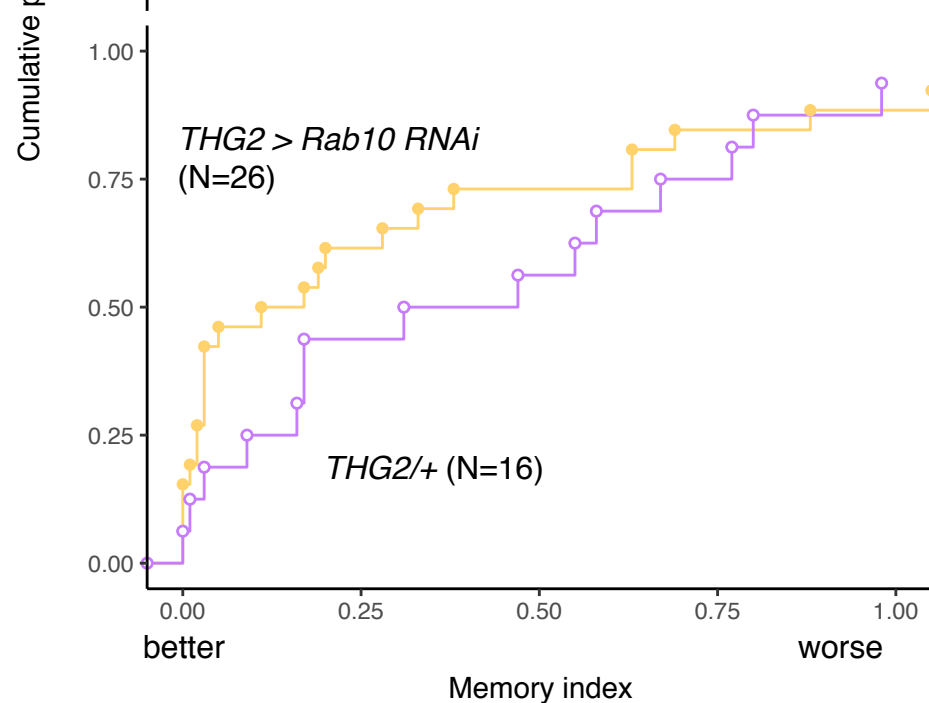



**A** *THG2 > mCD8-GFP*

GFP/ $\alpha$ -LRRK2

GFP

$\alpha$ -LRRK2

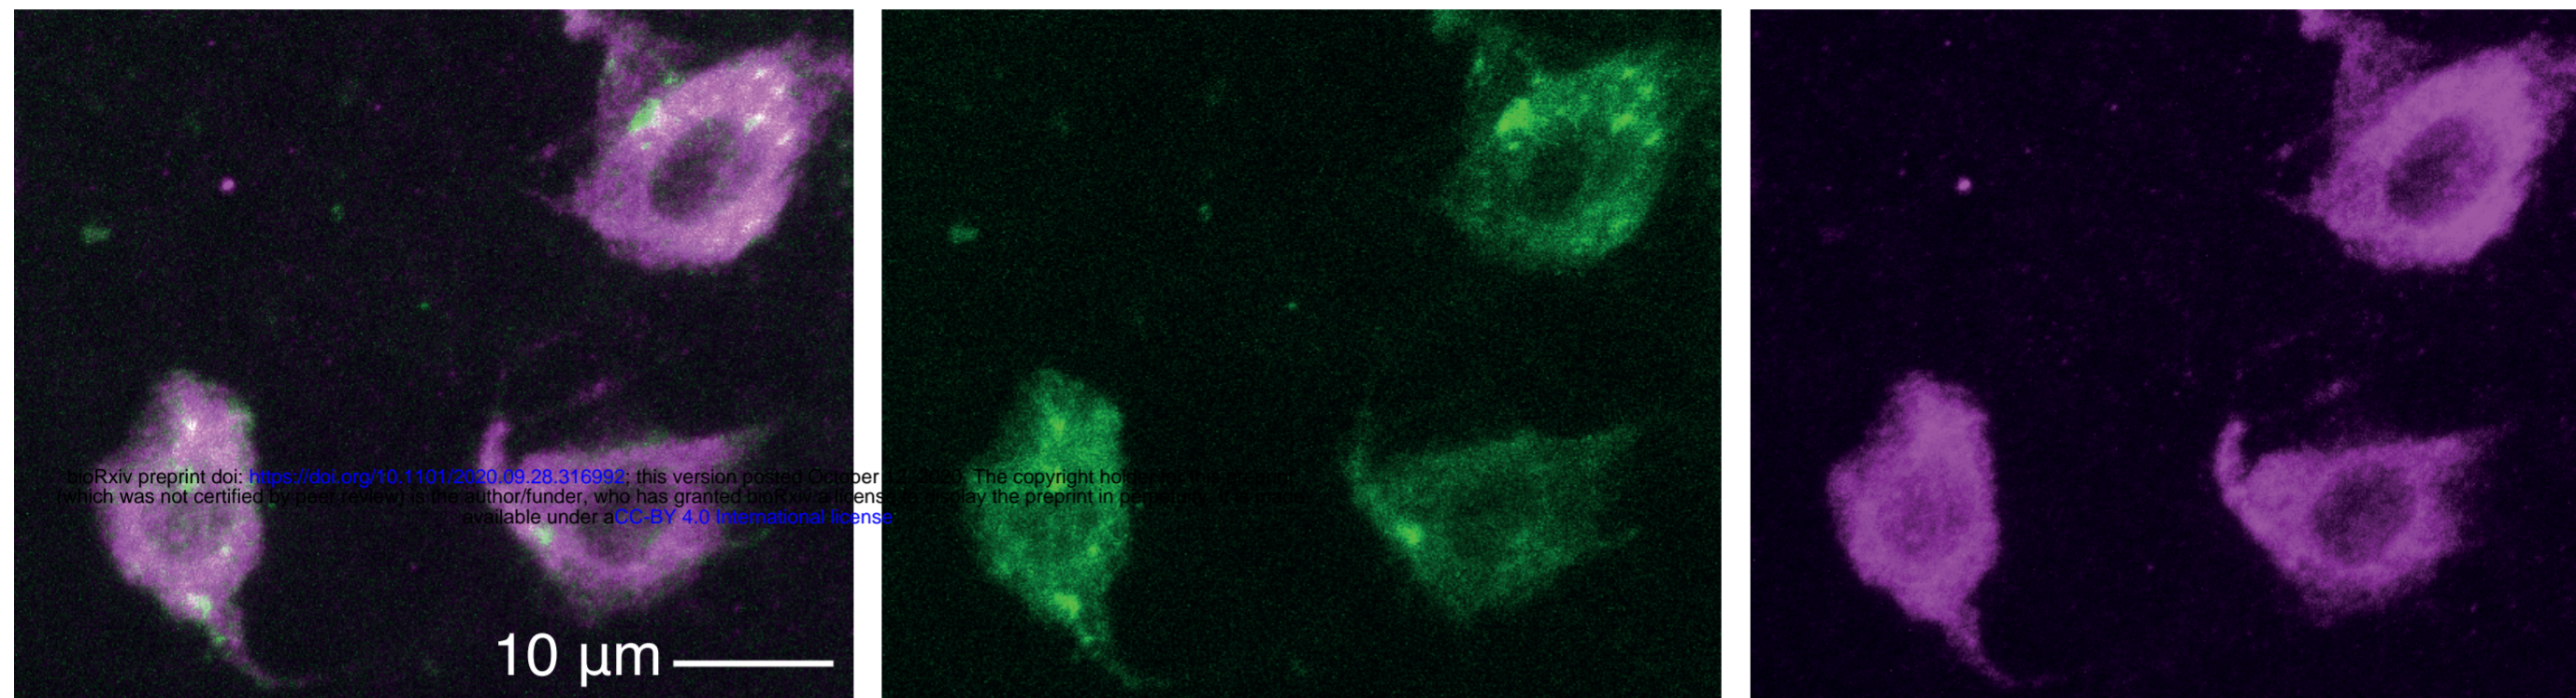

**B** *TH > Rab10-YFP*

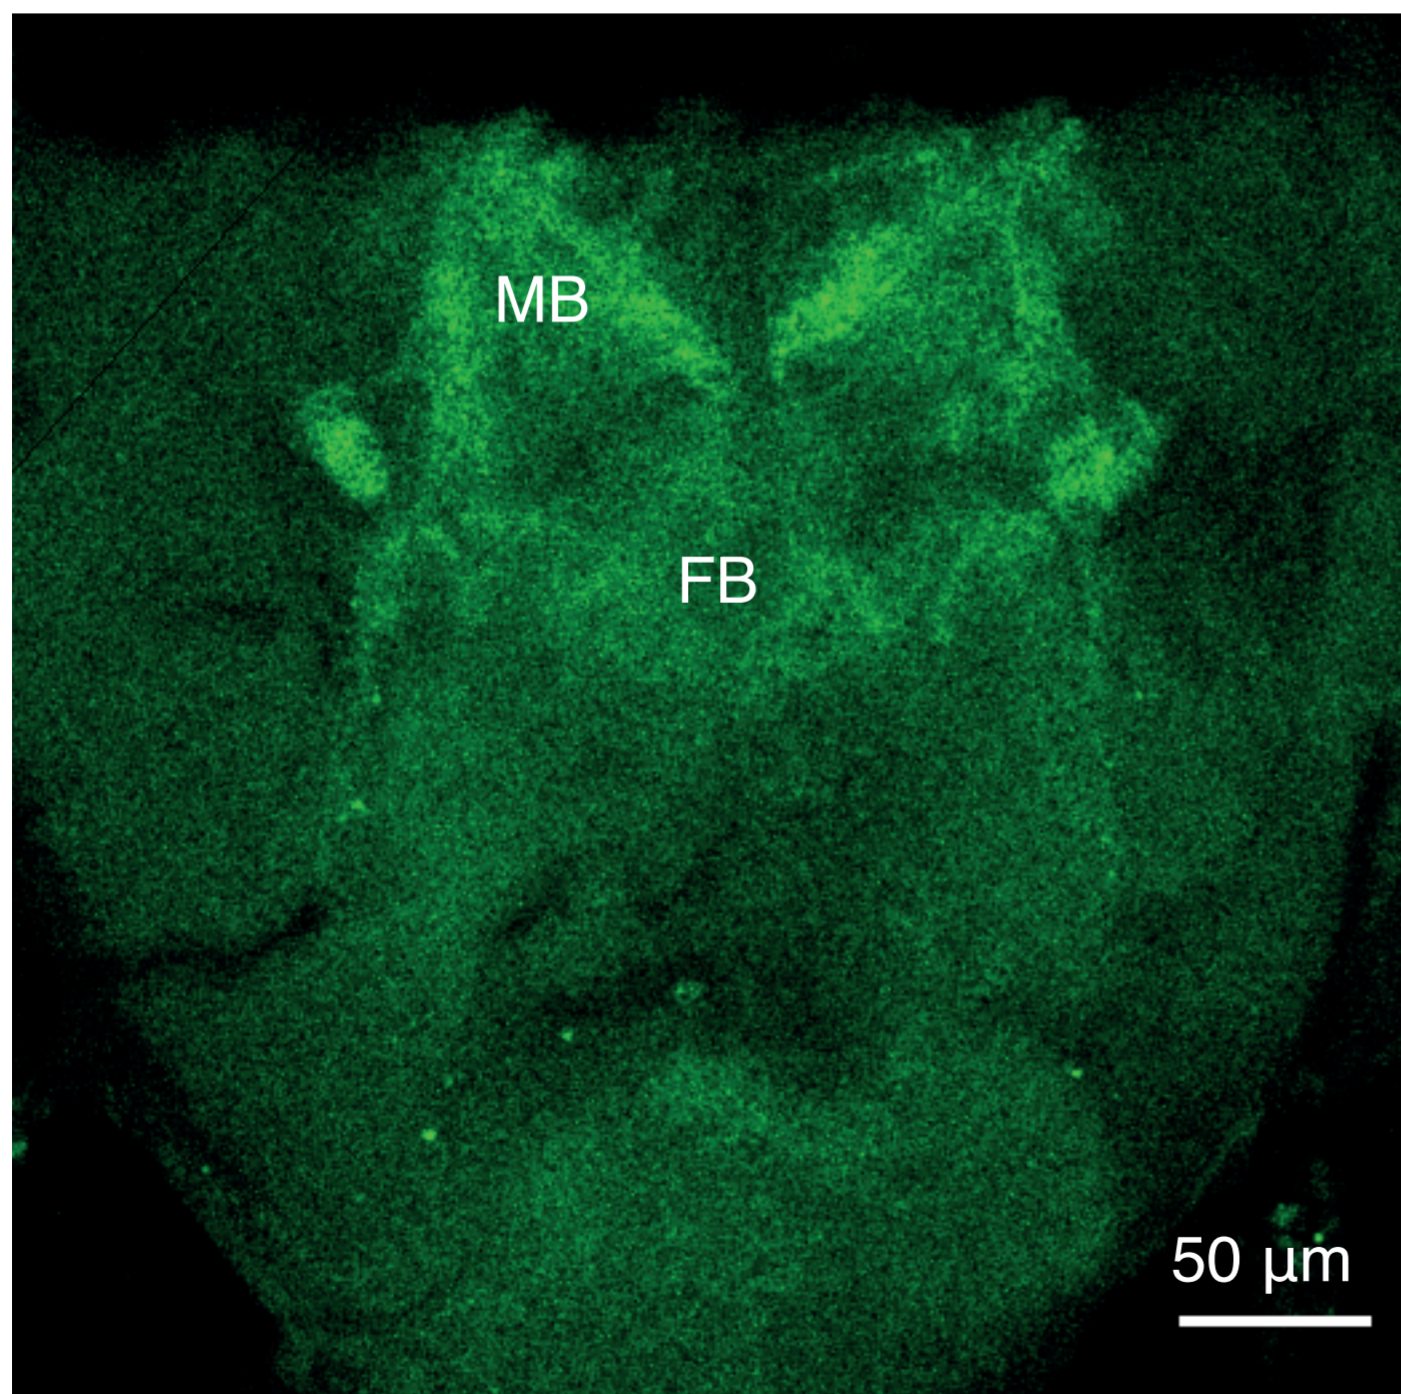

**C** *THG2*  $\alpha$ -LRRK2

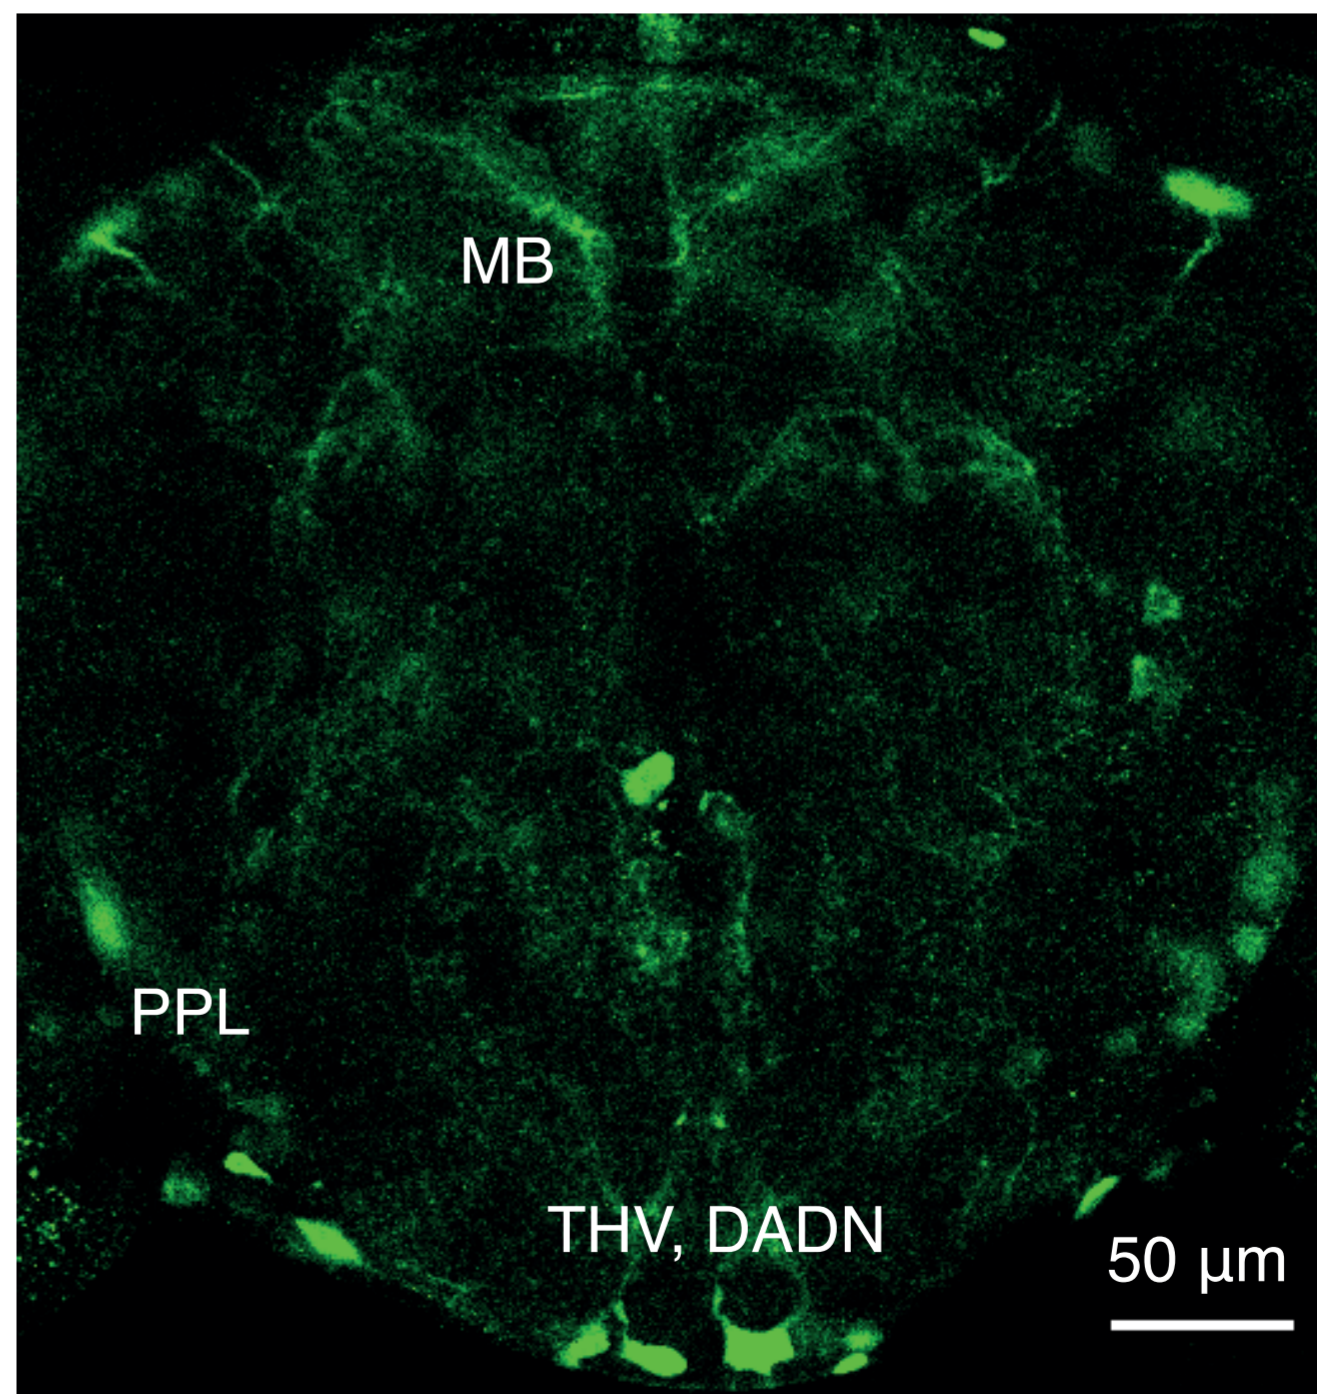

Source: https://www.biorxiv.org/content/10.1101/2020.09.28.316992v2.full.pdf
